1 **“Integrative Genomic Analysis for the Bioprospection of Regulators and Accessory**  
2 **Enzymes Associated with Cellulose Degradation in a Filamentous Fungus (*Trichoderma***  
3 ***harzianum*)”**

4  
5 Jaire A. Ferreira Filho<sup>1,2</sup>, Maria Augusta C. Horta<sup>1,3</sup>, Clelton A. dos Santos<sup>1</sup>, Deborah A.  
6 Almeida<sup>1,2</sup>, Natália F. Murad<sup>1</sup>, Juliano S. Mendes<sup>1</sup>, Danilo A. Sforça<sup>1</sup>, Claudio Benício C.  
7 Silva<sup>1</sup>, Aline Crucello<sup>1</sup>, Anete P. de Souza<sup>1,4,\*</sup>

8  
9 <sup>1</sup>Center for Molecular Biology and Genetic Engineering (CBMEG), University of Campinas  
10 (UNICAMP), Campinas, SP, Brazil

11 <sup>2</sup>Graduate Program in Genetics and Molecular Biology, Institute of Biology, UNICAMP,  
12 Campinas, SP, Brazil

13 <sup>3</sup>Holzforshung München, TUM School of Life Sciences Weihenstephan, Technische  
14 Universität München, 85354 Freising, Germany

15 <sup>4</sup>Department of Plant Biology, Institute of Biology, UNICAMP, Campinas, SP, Brazil

16

17 **\* Correspondence:**

18 Profa Anete Pereira de Souza

19 Dept. de Biologia Vegetal

20 Universidade Estadual de Campinas

21 CEP 13083-875

22 Campinas, São Paulo, Brazil

23 Tel.: +55-19-3521-1132

24 E-mail:anete@unicamp.br

25

26

27 **Abstract**

28 **Background:** Unveiling fungal genome structure and function reveals the potential  
29 biotechnological use of fungi. *Trichoderma harzianum* is a powerful CAZyme-producing  
30 fungus. We studied the genomic regions in *T. harzianum* IOC3844 containing CAZyme  
31 genes, transcription factors and transporters.

32 **Results:** We used bioinformatics tools to mine the *T. harzianum* genome for potential  
33 genomics, transcriptomics, and exoproteomics data and coexpression networks. The DNA  
34 was sequenced by PacBio SMRT technology for multi-omics data analysis and integration. In  
35 total, 1676 genes were annotated in the genomic regions analyzed; 222 were identified as  
36 CAZymes in *T. harzianum* IOC3844. When comparing transcriptome data under cellulose or  
37 glucose conditions, 114 genes were differentially expressed in cellulose, with 51 CAZymes.  
38 CLR2, a transcription factor physically and phylogenetically conserved in *T. harzianum* spp.,  
39 was differentially expressed under cellulose conditions. The genes induced/repressed under  
40 cellulose conditions included those important for plant biomass degradation, including CIP2  
41 of the CE15 family and a copper-dependent LPMO of the AA9 family.

42 **Conclusions:** Our results provide new insights into the relationship between genomic  
43 organization and hydrolytic enzyme expression and regulation in *T. harzianum* IOC3844. Our  
44 results can improve plant biomass degradation, which is fundamental for developing more  
45 efficient strains and/or enzymatic cocktails for the production of hydrolytic enzymes.

46 **Keywords:** cellulose degradation, CAZymes, genomic, transcriptome, fungi

47

48

49

50

## 51 **Background**

52 *Trichoderma harzianum* is a common fungal species in soil and is used as a biological control  
53 in a variety of phytopathogenic fungi [1]. However, the use of lignocellulosic biomass  
54 degradation is still poorly explored when compared to that of other cellulolytic fungi. Due to  
55 the high cellulolytic activity of some strains, *T. harzianum* has shown considerable potential  
56 for application in plant biomass hydrolysis [2-4]. *T. harzianum* strains have potential for the  
57 production of an enzymatic/protein arsenal necessary for the complete hydrolysis of  
58 cellulosic compounds in fermentable sugars [5-10].

59 Currently, the most-studied and widely used industrial-scale enzymes are produced by  
60 the fungus *T. reesei* and species from the *Aspergillus* genus. These organisms are the source  
61 of the majority of enzymes that make up enzymatic cocktails that are available on the market  
62 [11]. *T. reesei* is a widely studied fungus and is found in several works in genomics,  
63 transcriptomics, proteomics and metabolic engineering [12-16]. Thus, increasing the number  
64 of biotechnological studies related to this bioprocess for *T. harzianum* is necessary.

65 The three main groups involved in the hydrolysis of cellulose (CEL) are  
66 cellobiohydrolases, endo- $\beta$ -1,4-glucanases and  $\beta$ -glucosidases. In addition, accessory  
67 enzymes such as copper-dependent lytic polysaccharide mono-oxygenases (LPMOs),  
68 cellulose-induced protein 1 and 2 (CIP1 and CIP2) and swollenin also participate in this  
69 process [17-20].

70 One of the great challenges in understanding the molecular mechanism of biomass  
71 degradation is how the transcription factors (TFs) related to this system act. Several fungal  
72 TFs have been identified as related to the degradation of plant biomass, many of which  
73 belong to the binuclear zinc family [21]. Many TFs have been described as being directly  
74 involved in the regulation of plant biomass [22]. This number has been expanding rapidly in  
75 recent years, mainly due to the increase in the sequencing scale of whole genomes and the

76 exponential increase in bioinformatics tools for analysis, which produce massive amounts of  
77 information, and in the number of genes identified [22, 23].

78 The purpose of the present study was to analyze genomic regions with CAZyme  
79 genes using a bacterial artificial chromosome (BAC) library that we built [24] and to  
80 integrate these data with RNA-seq, secretome data and coregulation networks. We sequenced  
81 a massive amount of DNA and used it to integrate genomic data (genomic regions containing  
82 CAZymes), expression patterns (the transcriptome under degradation conditions), proteins  
83 (the secretome by mass spectrometry) and systems biology (with gene regulatory networks)  
84 to obtain a broad and precise overview of the CEL degradation pathways. Based on our  
85 study, we characterized the main genes, accessory enzymes and regions involved in the  
86 degradation and regulation process of hydrolytic enzymes. In addition, we analyzed the  
87 regulator cellulose degradation regulator 2 (CLR2) found in a cluster with other important  
88 enzymes. These results will be important for further studies of regulation and gene silencing.

89

## 90 **Results**

91

### 92 ***Genomic regions of T. harzianum IOC3844***

93 In this study, a library of large genomic regions was used as a resource to search for genes of  
94 interest and to thoroughly study the genomic structure of *T. harzianum* IOC3844  
95 (ThIOC3844) (accession numbers MK861589-MK861650 - Supplementary Table S1 and  
96 Fig. S1). Screening for genes of interest resulted in a total of 62 regions that contained  
97 CAZymes genes related to the degradation of plant biomass in the ThIOC3844 genome.  
98 Sequencing of these regions generated a total of 5 Mb of the estimated 40 Mb genome  
99 (Supplementary Table S2 and S3). These regions ranged in size from 43 to 152 kb, enabling

100 the prediction and annotation of 1676 gene models for this strain (Supplementary Table S4).

101 The average number of genes per region was 26 (Supplementary Table S1).

102 The genome of *T. reesei* QM6a (PRJNA325840) was used to analyze the distribution  
103 of genes in ThIOC3844. This genome, which is composed of seven chromosomes with a total  
104 size of 34 Mb, was divided into 38 intervals (1 Mb) (Fig. 1). It was possible to observe  
105 CAZyme genes annotated in ThIOC3844 distributed throughout the whole genome. Only  
106 four intervals had no CAZyme genes, and when all the genes in the genomic regions of  
107 ThIOC3844 were mapped, genes were found in all intervals.

108 The genes were functionally annotated for the main gene ontologies: biological  
109 processes, cellular components and molecular functions (Fig. 2a and Supplementary Fig. S2).  
110 We found 209 sequences of hydrolytic activity, 139 related to transport proteins and 85  
111 sequences involved in regulation of gene expression (possible TFs). In addition, a specific  
112 annotation was made for genes identified as enzymes, where hydrolases (40%),  
113 oxidoreductases (25%), transferases (22%), lyases (6%), ligases (4%) and isomerases (3%)  
114 (Figure 2b) were found. We also identified genes directly related to the degradation of CEL  
115 and hemicellulose, with action of  $\alpha$ -L-arabinofuranosidase (EC 3.2.1.55), endo-1,4- $\beta$ -  
116 xylanases (EC 3.2.1.8), cellobiohydrolases (3.2.1.91), endo- $\beta$ -1,4-glucanase (EC 3.2.1.4) and  
117  $\beta$ -glucosidase (EC 3.2.1.21) (Fig. 2c and Supplementary Table S5).

118 A total of 1676 genes were predicted. Of these, 222 were annotated as CAZymes in  
119 ThIOC3844, including 45% of GHs, 23% of GTs, 10% of CEs, 8% of AAs and 14% of  
120 CBMs (Fig. 3 and Supplementary Table S6). The GH class presented with the highest  
121 number of families, including GH2 (3 genes), GH7 (1 gene), GH3 (9 genes), GH5 (6 genes),  
122 GH12 (1 gene), GH18 (4 genes) and GH62 (1 gene).

123

124 ***Genomic comparison***

125 For this analysis, we compared the genomic regions of ThIOC3844 against the entire genome  
126 of different strains and species of the genus *Trichoderma*. Genomic comparison of the  
127 sequenced regions of ThIOC3844 with two other strains of the same species (*T. harzianum*  
128 B97 – ThB97 and *T. harzianum* – T6766) showed a higher similarity to ThB97 (99.25%) than  
129 ThT6766 (91.61%). For the *T. atroviride* IMI206040 genome (TaIMI206040), the similarity  
130 to ThIOC3844 was 85.09%. For *T. virens* Gv29-8 (TvGv29-8), the similarity was 86.55%,  
131 and for *T. reesei* QM6a (TrQM6a), the similarity was 85.11%.

132 When we compared syntenic genes between groups of genes, a greater difference  
133 between *T. harzianum* and *T. atroviride* and *T. reesei* was observed. The *T. harzianum*  
134 TR274 (ThTR274) strain presented the same gene profile of genomic organization as that  
135 found in ThIOC3844. In TaIMI206040, four genes (GH4, transporter and two GH26) from  
136 the cluster were not found; for TvGv29-8, two genes were not found (GH1 and GH4). For *T.*  
137 *reesei* QM6a, three genes (GH4 and two GH26) were not found; in addition, the translocation  
138 of genes (MFS x GH2 and TF2 x CLR2) was found. The genes for the transcription factor  
139 CLR2, putative transcription factor TF2 and MFS (major facilitator superfamily permease)  
140 were maintained in all species analyzed. This result suggests a potential association between  
141 the regulation and expression of these genes (Fig. 4).

142

### 143 ***Expression by RNA-Seq and secreted proteins***

144 All genes predicted in the genomic regions were analyzed according to expression data by  
145 RNA-Seq (under CEL and GLU degradation conditions) (Supplementary Table S7) and  
146 secreted proteins identified by mass spectrometry (LC-MS/MS). We found 114 genes with  
147 differential expression under CEL degradation conditions when compared to GLU  
148 degradation conditions; among them, 51 were classified as CAZymes, such as beta-  
149 glucosidase of the GH1 family (1.8-fold change - FC), LPMOs of the AA9 family (FC 5.0)

150 and hypothetical protein with domain CBM1 (FC 3.7). In addition, two differentially  
151 expressed TFs were identified, CLR2 (FC 1.6) and unidentified transcriptional regulator of  
152 zing finger – Zn2Cys6 (FC 2.3). Six transport proteins were also found (iron permease, MFS  
153 hexose transporter, siderophore transporter, ammonium permease, sugar transporter and  
154 siderophore iron transporter).

155       Among the genes annotated as CAZymes in ThIOC3844, 31 were found in the  
156 secretome of ThIOC3844 under CEL conditions, and the main families were GH3, GH12,  
157 CBM1, AA9, GH6/CBM1, GH45/CBM1, GH62 and GH5. In this analysis, we also used the  
158 level of expression of the secreted genes. The gene with the highest TPM index (1567.4  
159 TPM) is a cellobiohydrolase (EC 3.2.1.91) of the GH6 family. However, our results indicate  
160 that genes with low expression levels are also important secreted enzymes (Table 1).

161

### 162 ***CLR2 transcription factor***

163 The phylogenetic analysis of the CLR2 factor showed a clear separation of this TF in relation  
164 to Basidiomycetes and Ascomycetes (Fig. 5a and Supplementary Table S8). However, even  
165 within these groups, considerable phylogenetic diversity was observed among the species of  
166 analyzed fungi with a variety of clades within the same group. Different strains of *T.*  
167 *harzianum* grouped in a single clade with proximity to *T. reesei* and *T. atroviride* species.  
168 Our results show a wide range of functional variety for CLR2, which may indicate different  
169 types of performance between species.

170       A structural modeling analysis for the CLR2 protein of ThIOC3844 was performed  
171 using *T. reesei* as a comparator. For both proteins, the best template was [6F07](#)  
172 (*Saccharomyces cerevisiae*), with e-values of  $4.07e^{-06}$  and  $6.62e^{-06}$  for ThIOC3844 (Figure  
173 5b) and *T. reesei* (Figure 5c), respectively. Prediction of 1 and 3 protein domains was made  
174 for ThIOC3844 and *T. reesei*, respectively. For ThIOC3844, 59% of the residues were

175 already modeled, and for *T. reesei*, it was possible to model 83%. For ThIOC3844, the  
176 secondary structure prediction was 46% H (helix), 0% E (beta-sheet) and 53% C (loop), and  
177 for solvent access, it was 56% E (exposed), 19% M (medium) and 23% B (buried).

178 A coregulation network of genes directly related to the CLR2 regulator was  
179 constructed, searching for insights about other important proteins in the process of cellulase  
180 expression. We identified 36 genes directly linked to CLR2, of which 21 genes were  
181 annotated as hypothetical proteins. In addition, we found that genes with known annotations  
182 were related to the process of gene expression, including genes annotated as initiation factors,  
183 kinases and helicases (Fig. 6a and Supplementary Table S9).

184

#### 185 *Network of induced/repressed genes in cellulose*

186 Using the gene expression data of the secreted proteins, a Bayesian network of  
187 induced/repressed genes was constructed based on the CEL growth conditions for *T.*  
188 *harzianum* IOC3844 (Fig. 6b). The major genes that were induced under this condition  
189 belong to the GH7 (exoglucanase), GH5 (endo- $\beta$ -1,4-glucanase), GH3 ( $\beta$ -glucosidase), GH12  
190 (murein transglycosylase), CE15 (CIP2), AA9 (LPMO) and AA8 (hypothetical protein)  
191 families. In addition, seven genes that were not classified as CAZymes were also induced  
192 under CEL conditions. The families of repressed genes were GH10 (glycoside hydrolase 10  
193 family endo-1,4- $\beta$ -xylanase), GH11 (glycoside hydrolase 11 family endo-1,4- $\beta$ -xylanase),  
194 GH76 (alcohol dehydrogenase 1), GH20 ( $\beta$ -N-acetylhexosaminidase) and GH35 (glycoside  
195 hydrolase 35).

196

#### 197 **Discussion**

198 In the present study, an integrative multi-omics approach was used to mine CAZyme-rich  
199 regions of ThIOC3884. BAC clones were selected, sequenced and used in comparative



200 analyses focusing on the expression profile via RNA-Seq and the exoproteome under  
201 different fungal growth conditions, enabling the discovery of important gene/proteins related  
202 to plant biomass degradation (Supplementary Fig. S3).

203 The vast majority of important enzymes for the degradation of plant biomass are  
204 already known [25-27]. The current challenge is how enzymes are regulated and the genetic  
205 mechanism of their activation. Thus, many works with cellulolytic fungi have focused on  
206 TFs, accessory enzymes, transporters and the way the type of biomass affects the process of  
207 regulating the cellulases and hemicellulases [22, 28-30]. Other studies have already shown  
208 the potential of *T. harzianum* for the degradation of plant biomass. This is the first work that  
209 integrates results from different biotechnology approaches and that focuses on the prediction  
210 of the most important enzymes and TFs used by *T. harzianum* IOC3844 to degrade CEL.

211 The molecular process of CEL degradation is extremely complex and involves  
212 hydrolytic enzymes acting on the extracellular medium, carrier proteins and TFs (Figure 7).  
213 For *T. harzianum* and *T. reesei*, the major CAZy families related to CEL degradation were  
214 identified in the genome (GH1, GH3, GH6, GH7, GH12, GH45 and AA9) [7], and many of  
215 the cellulases have already had their three-dimensional structure solved; however, many key  
216 proteins in this process are not well known as transporter TFs related to the regulation of  
217 these enzymes.

218 The study of genomic regions is an important tool for providing a global view of the  
219 important genes and regulatory regions of a genome [24, 31]. The genomes of a few strains of  
220 *T. harzianum* are available [32, 33]. A complete genome draft sequenced in 1572 scaffolds is  
221 available for *T. harzianum* T6776 [32]; however, little is known about the ThIOC3844  
222 genome, and as it is a strain with potential for hydrolytic enzymes, more genomic information  
223 regarding CAZyme sequences is needed. In this study, our strategy was to use large genomic  
224 regions and integrate these data with other genetic information.

225           A large number of fungal genomes have already been used as a platform to search for  
226 new genes related to the degradation of biomass, as is the case for *T. reesei* QM6a, which has  
227 a finalized genome divided into seven chromosomes [34]. Our study results with the genomic  
228 regions of ThIOC3844 showed a large number of enzymes classified as CAZymes, as well as  
229 TFs and transporters in clusters in the genome, which may be important for future studies of  
230 genetic modification of this lineage.

231           Analyzing the level of expression of certain genes under certain conditions is an  
232 important step in understanding how transcription is affected in a specific biological  
233 condition [17, 35]; however, there is not always a direct relationship between what is being  
234 highly expressed and the proteins that are important in the extracellular medium. Thus, in this  
235 work, in addition to studying the most expressed genes that we found in the genomic regions,  
236 we also searched for those with a confirmed presence in the fungus secretome CEL  
237 degradation conditions. Our results showed that CAZy families are key in the degradation of  
238 CEL, with a high level of expression and a positive presence as a secreted protein.

239           Genomic comparison is a powerful tool for understanding differences and  
240 evolutionary dynamics among related species [36-38]. Our data show a high similarity  
241 between different strains of *T. harzianum* (IOC3844, B97 and T6776), which indicates that  
242 differences in enzyme production and efficiency may be related more to gene regulation  
243 mechanisms than differences in the sequence itself. In addition, by synteny analysis, it was  
244 possible to observe a greater difference in relation to the genome of *T. reesei*, which can be  
245 explained by the loss of genes and genomic modifications carried out in lineages of this  
246 fungus to increase its productivities of enzymes related to plant biomass degradation [12, 39].

247           The CLR2 transcription factor was described as an important regulator in the  
248 expression of cellulases by *Neurospora crassa* [22]; however, its functional role is not yet  
249 clear for fungi of the genus *Trichoderma*, including *T. reesei* [14, 40]. In the genome of

250 ThIOC3844, we found a cluster with the CLR2 TF in association with other putative  
251 transcription factors, CAZymes, transporters and MFS permease. The same behavior was  
252 found for the *T. reesei* CLR2 TF, which has physical proximity and coexpression with a  
253 sugar transporter [29, 41]. These results indicate that there may be a mechanism for the joint  
254 regulation and expression of this TF with transporters related to biomass degradation. Based  
255 on RNA-Seq data, we observed differential expression of CLR2 in the cellulose condition. In  
256 this way, we analyzed the coregulation network of the CLR2 regulator. The present study  
257 illuminates unclear areas of the genomic organization, expression and putative regulation of  
258 CLR2 in *T. harzianum*.

259 Coregulation networks provide insights into how genes correlate and interact with  
260 each other [35, 42, 43]. We identified 36 genes directly associated with the CLR2 regulatory  
261 factor; these genes may be important in the regulation process of this factor, which is linked  
262 to the expression of cellulases in other filamentous fungi. Techniques such as gene knockout  
263 can further validate the functional or synergistic importance of these genes with key TFs for  
264 the expression of genes related to degradation of plant biomass.

265

## 266 **Conclusions**

267 Our results present an innovative approach in using different types of omics data to search for  
268 new important genes and genetic regulation mechanisms during the process of CEL  
269 degradation. We found several TFs, accessory enzymes and transporters in the genomic  
270 regions of ThIOC3844 that may be important for the expression/secretion of CAZyme genes.  
271 Among these, CLR2, CIP2 and LPMOs are promising candidates for further study. Our  
272 results indicate that the CLR2 regulator matches all the requirements for involvement in  
273 cellulose degradation by *T. harzianum*. In addition, through the approach of coregulation  
274 networks, it is possible to understand the relationship between genes and to find new targets

275 for biochemical characterization. The results allowed the identification of important genetic  
276 regions, key genes and functional proteins, and this information can be used for the  
277 development and improvement of enzymatic hydrolysis technology for the bioethanol  
278 industry.

279

## 280 **Methods**

281

### 282 ***T. harzianum strain and genomic resources***

283 *T. harzianum* IOC3844 (ThIOC3844) was obtained from the Brazilian Collection of  
284 Environment and Industrial Microorganisms (CBMAI). A library of BACs consisting of  
285 5,760 clones previously constructed for this fungus strain [24] was used to search for  
286 genomic regions. The genomic sequences of *T. harzianum* T6776 ([PRJNA252551](#)), *T. reesei*  
287 QM6a ([PRJNA325840](#)), *T. atroviride* IMI206040 ([PRJNA19867](#)) and *T. virens* Gv29-8  
288 ([PRJNA19983](#)) were used for comparison with ThIOC3844.

289

### 290 ***BAC library screening for gene selection in T. harzianum IOC3844***

291 We designed primers for 62 target CAZyme genes (Supplementary Table S1) using  
292 transcriptome data [3] to search for positive BAC clones that contain genes previously  
293 selected from the plate (with the complete BAC library comprising fifteen 384 plaques) and  
294 column pools (24 columns of each plate). The plate and column pools were amplified using  
295 the Illustra GenomiPhi HY DNA Amplification Kit (GE Healthcare Life Sciences, UK)  
296 following the manufacturer's instructions. The screening reactions for the search for positive  
297 clones were performed via PCR using the CFX384 Touch Real-Time PCR Detection System  
298 (Bio-Rad).

299

300 ***Single-molecule real-time (SMRT) sequencing and assembly***

301 Libraries for sequencing were prepared according to the Pacific Biosciences (PacBio)  
302 protocol, and sequencing was performed at the Arizona Genomics Institute (AGI; Tucson,  
303 USA) using a Single-Molecule Real-Time (SMRT) DNA sequencing system available from  
304 PacBio. *De novo* assembly was performed with the PacBio Corrected Reads (PBcR) pipeline  
305 implemented as part of Wgs-assembler v8.3rc2 [44] and Celera Assembler [45]. The contigs  
306 obtained with the assemblers were subjected to error correction with pbalgn (v0.2). The  
307 PacBio reads were aligned using the BLASR algorithm [46], and assembly polishing was  
308 performed with the Quiver tool (Supplementary Table S2 and S3) [47].

309

310 ***Gene prediction and functional annotation***

311 The FGENESH tool was used for initial gene prediction analysis [48], followed by manual  
312 correction with the *T. harzianum* T6776 and *T. reesei* QM6a gene models. Annotations of the  
313 ontologies were performed with Blast2GO [49]. InterPro protein domains were predicted  
314 using InterProScan (<http://www.ebi.ac.uk/interpro/>) [50]. Information derived from the CAZy  
315 database was downloaded for each CAZyme family ([www.cazy.org](http://www.cazy.org)). The protein sequences  
316 of *T. harzianum* IOC3844 were used as queries in basic local alignment search tool  
317 (BLASTp) searches against the locally built CAZyme BLAST database. Only BLAST  
318 matches showing an e-value less than  $10^{-11}$ , identity greater than 30% and queries covering  
319 greater than 70% of the sequence length were retained and classified according to the  
320 CAZyme catalytic group as glycoside hydrolases (GHs), glycosyl transferases (GTs),  
321 polysaccharide lyases (PLs), carbohydrate esterases (CEs), carbohydrate-binding modules  
322 (CBMs) or auxiliary activities (AAs).

323

324 ***Genomic comparison in Trichoderma spp.***

325 The software used for alignment was Nucmer (-maxmatch), which is part of the software  
326 package MUMmer 3.23 [51]. The delta-filter (-q), show-coords (-rcl), and DNADIFF  
327 (standard parameters) were used for filtering, obtaining the mapping coordinates and  
328 generating the statistical report in the alignment, respectively. SimpleSynteny software  
329 (<https://www.dveltri.com/simplesynteny/>) [52] was used to compare a cluster of 12 genes  
330 among different species of *Trichoderma* spp.

331

### 332 ***Phylogenetic analysis and structure modeling of CLR2***

333 The CLR2 sequences of ThIOC3844, *T. reesei* QM6a, *T. atroviride*, *T. virens* and other  
334 species of fungi were used as the basis for constructing the phylogenetic trees. These fungi  
335 were divided into Ascomycetes and Basidiomycetes. The sequences were aligned using  
336 ClustalW [53] and analyzed with Molecular Evolutionary Genetics Analysis (MEGA)  
337 software v7.0 (<https://www.megasoftware.net/>) [54]. The phylogenetic analyses were  
338 performed in MEGA7 using the maximum likelihood (ML) [55] method of inference based  
339 on the Jones-Taylor-Thornton (JTT) matrix-based model and 1000 bootstrap replicates [56]  
340 for each analysis. Pairwise deletion was employed to address alignment gaps and missing  
341 data. The trees were visualized and edited using the FigTree program  
342 (<http://tree.bio.ed.ac.uk/software/figtree/>). *In silico* modeling of the domain of CLR2 was  
343 performed using RaptorX protein structure prediction software (<http://raptorx.uchicago.edu/>)  
344 [57].

345

### 346 ***RNA-Seq and exoproteome analysis***

347 The expression levels of ThIOC3844 were analyzed using RNA-Seq data ([PRJNA336221](https://pubmed.ncbi.nlm.nih.gov/336221/))  
348 obtained from a previous study in which the transcripts were obtained following growth of  
349 the fungus on two different carbon sources, CEL and GLU [35]. The reads from the RNA-

350 Seq library were mapped against the ThIOC3844 genes using the CLC Genomics Workbench  
351 (<https://www.qiagenbioinformatics.com/products/clc-genomics-workbench/>) [58]. The  
352 expression values were expressed in reads per kilobase of exon model per million mapped  
353 reads (RPKM), and the normalized value for each sample was calculated in transcripts per  
354 million (TPM). For the analysis of differential expression, the following parameters were  
355 used: fold change greater than or equal to 1.5 and p-value lower than 0.05. The analysis of the  
356 exoproteome was performed by means of a BLASTn search of the predicted gene of  
357 ThIOC3844 against the local database of protein sequences from *T. harzianum* found in the  
358 extract of fungal growth under CEL and GLU conditions.

359

### 360 ***Gene regulatory network***

361 The gene regulatory networks were assembled from the reference mapped RNA-Seq data  
362 using each set of biological triplicates for the CEL and GLU conditions [35]. The interaction  
363 between the genes was obtained by calculating Pearson's correlation for each pair of genes.  
364 The induction and repression networks were constructed based on the expression data of a set  
365 of genes that were identified in the secretome of the CEL growth condition by the Bayesian  
366 inference method [59]. If the secreted protein was present in the condition, it was assigned a  
367 value of one. If the secreted protein was absent, it was assigned a value of zero. The treatment  
368 conditions were considered as regulators of the network to detect the direct relationships  
369 between the conditions and the genes. Thus, the Bayesian network represents the  
370 relationships among the conditions, gene expression, and secreted proteins. Cytoscape  
371 software v 3.4.042 [60] (<https://cytoscape.org/>) was used for data analysis and construction of  
372 the CLR2 subnetwork.

373

374

375 **Additional files**

376 **Additional file 1: Fig S1.** Screening genes of interest in the genomic library of *T. harzianum*  
377 IOC3844 by qPCR (a); reads size sequenced using PACBio technology (b); genes cluster in a  
378 genomic region of *T. harzianum* (c). **Fig. S2.** Distribution of the main GO terms of the  
379 annotated genes in *T. harzianum* IOC3844. **Fig. S3.** Pipeline approach for the analyzes used  
380 in this work of genes and genomic study in *T. harzianum*. **Supplementary Table S2.**  
381 Assembly parameters of a set of sequenced genomic region using PACBio technology.  
382 **Supplementary Table S3.** Comparison of genomic data among different species of  
383 *Trichoderma* spp. **Supplementary Table S8.** Description of the species used for the  
384 phylogenetic analysis of the transcription factor CLR2. **Supplementary Table S9.**  
385 Description of the genes found in the coregulation networks.

386 **Additional file 2: Supplementary Table S1.** Description of the genomic regions sequenced  
387 in *T. harzianum* IOC3844.

388 **Additional file 3: Supplementary Table S4.** Annotation of all genes predicted in *T.*  
389 *harzianum* IOC3844.

390 **Additional file 4: Supplementary Table S5.** Description of the EC codes for *T. harzianum*  
391 IOC3844 genes.

392 **Additional file 5: Supplementary Table S6.** Description of the CAZymes genes for *T.*  
393 *harzianum* IOC3844.

394 **Additional file 6: Supplementary Table S7.** Level of expression of the genes annotated in  
395 *T. harzianum* IOC3844 by means of RNA-seq.

396

397 **List of abbreviations**

398 **AA:** Auxiliary enzymes; **B:** buried; **BAC:** bacterial artificial chromosome; **BLAST:** Basic  
399 local alignment search tool; **bp:** Base pair; **BRENDA:** Braunschweig Enzyme Database; **C:**



400 loop; **CAZymes**: Carbohydrate-active enzymes; **CBMAI**: Brazilian Collection of  
401 Environment and Industrial Microorganisms; **CBM**: Carbohydrate-binding module; **CE**:  
402 Carbohydrate esterases; **CEL**: Cellulose; **CIP1**: cellulose-induced protein 1; **CIP2**:  
403 cellulose-induced protein 2; **CLR2**: cellulose degradation regulator 2; **DNA**:  
404 Deoxyribonucleic acid; **E**: beta-sheet; **EC**: Enzyme commission number; **Ex**: exposed; **FC**:  
405 fold change; **GH**: Glycoside hydrolases; **GLU**: Glucose; **GO**: gene ontologies; **GT**:  
406 Glycosyltransferases; **H**: helix; **JTT**: Jones-Taylor-Thornton; **kb**: Kilobases; **LPMO**: Lytic  
407 polysaccharides monooxygenase; **M**: medium; **Mb**: Megabase; **MEGA**: Molecular  
408 evolutionary genetics analysis; **MFS**: major facilitator superfamily permease; **ML**: maximum  
409 likelihood; **PacBio**: Pacific Biosciences; **PBCR**: PacBio Corrected Reads; **PCR**: Polymerase  
410 chain reaction; **PL**: Polysaccharide lyases; **RNA**: Ribonucleic acid; **RNA-Seq**: RNA  
411 sequencing; **RPKM**: Reads per kilobase of exon model per million mapped reads; **SMRT**:  
412 Single-Molecule Real-Time; **TaIMI206040**: *T. atroviride* IMI206040; **TFs**: transcription  
413 factors; **ThB97**: *T. harzianum* B97; **ThIOC3844**: *Trichoderma harzianum* IOC-3844;  
414 **ThTR274**: *T. harzianum* TR274; **Th6766**: *T. harzianum*; **TPM**: Transcripts per million;  
415 **TrQM6a**: *T. reesei* QM6a; **TvGv29-8**: *T. virens* Gv29-8

416

#### 417 **Declarations**

418

#### 419 ***Ethics approval and consent to participate***

420 Not applicable

421

#### 422 ***Consent for publication***

423 Not applicable

424

425 ***Availability of data and materials***

426 The RNA-seq data can be accessed by the accession number [PRJNA336221](https://www.ncbi.nlm.nih.gov/genbank/). Data from the  
427 genomic regions were submitted to GenBank (<https://www.ncbi.nlm.nih.gov/genbank/>) under  
428 the accession numbers MK861589-MK861650 (Supplementary Table S1).

429

430 ***Competing interests***

431 The authors declare that the research was conducted in the absence of any commercial or  
432 financial relationships that could be construed as a potential conflict of interest.

433

434 ***Funding***

435 This work was supported by grants from the Fundação de Amparo à Pesquisa do Estado de  
436 São Paulo (FAPESP 2015/09202-0), Coordenação de Aperfeiçoamento de Pessoal de Nível  
437 Superior (CAPES) Computational Biology Program (CBP) and Conselho Nacional de  
438 Desenvolvimento Científico e Tecnológico (CNPq). JAFF received a PhD fellowship from  
439 CNPq (170565/2017-3) and a PD fellowship from CAPES (CBP - 88887.334235/2019-00);  
440 MACH received a PD fellowship from CAPES (CBP) and a SWE PD fellowship from  
441 CAPES, Computational Biology Program; CAS received a PD fellowship from FAPESP  
442 (2016/19775-0) and a SWE PD fellowship from CAPES (CBP); DAA received partial MS  
443 fellowship from FAPESP (17/17782-2) and partial MS fellowship from CAPES (CBP); NFM  
444 received a PD fellowship from CNPq and CAPES (CBP); JSM received a PD fellowship  
445 from CNPq and CAPES (CBP); CBCS received a PD fellowship from FAPESP (17/26781-0)  
446 and CAPES (CBP); and APS is the recipient of a research fellowship from CNPq.

447

448 ***Authors' contributions***

449 APS and JAFF designed the study. JAFF, MACH, CAS, DAA, JSM, DAS and AC  
450 performed the research. JAFF, MACH, CAS, DAA, NFM and CBCS analyzed the data.  
451 JAFF, MACH, CAS and APS wrote the paper. All authors critically read the text and  
452 approved the manuscript.

453

#### 454 ***Acknowledgements***

455 We would like to acknowledge the funding from Fundação de Amparo à Pesquisa do Estado  
456 de São Paulo (FAPESP 2015/09202-0), Coordenação de Aperfeiçoamento de Pessoal de  
457 Nível Superior (CAPES, Computational Biology Program) and Conselho Nacional de  
458 Desenvolvimento Científico e Tecnológico (CNPq).

459

#### 460 ***Authors' information***

461 <sup>1</sup>Center for Molecular Biology and Genetic Engineering (CBMEG), University of Campinas  
462 (UNICAMP), Campinas, SP, Brazil. <sup>2</sup>Graduate Program in Genetics and Molecular Biology,  
463 Institute of Biology, UNICAMP, Campinas, SP, Brazil. <sup>3</sup>Holzforshung München, TUM  
464 School of Life Sciences Weihenstephan, Technische Universität München, 85354 Freising,  
465 Germany. <sup>4</sup>Department of Plant Biology, Institute of Biology, UNICAMP, Campinas, SP,  
466 Brazil.

467

#### 468 **References**

- 469 1. Elad Y, Chet I, Katan J. *Trichoderma harzianum*: a biocontrol agent effective against  
470 *Sclerotium rolfsii* and *Rhizoctonia solani*. *Phytopathology*. 1980;70:119-21.
- 471 2. Delabona PDS, Farinas CS, da Silva MR, Azzoni SF, Pradella JGC. Use of a new  
472 *Trichoderma harzianum* strain isolated from the Amazon rainforest with pretreated

- 473 sugar cane bagasse for on-site cellulase production. *Bioresour Technol.*  
474 2012;107:517-21.
- 475 3. Horta MA, Vicentini R, Pda SD, Laborda P, Crucello A, Freitas S, et al.  
476 Transcriptome profile of *Trichoderma harzianum* IOC-3844 induced by sugarcane  
477 bagasse. *PLoS One.* 2014;9:e88689.
- 478 4. Delabona PDS, Rodrigues GN, Zubieta MP, Ramoni J, Codima CA, Lima DJ, et al.  
479 The relation between *xyl1* overexpression in *Trichoderma harzianum* and sugarcane  
480 bagasse saccharification performance. *J Biotechnol.* 2017;246:24-32.
- 481 5. de Castro AM, Pedro KCNR, da Cruz JC, Ferreira MC, Leite SGF, Pereira N.  
482 *Trichoderma harzianum* IOC-4038: a promising strain for the production of a  
483 cellulolytic complex with significant  $\beta$ -glucosidase activity from sugarcane bagasse  
484 cellulignin. *Appl Biochem Biotechnol.* 2010;162:2111-22.
- 485 6. Santos CA, Zanphorlin LM, Crucello A, Tonoli CC, Ruller R, Horta MA, et al.  
486 Crystal structure and biochemical characterization of the recombinant ThBgl, a GH1  
487  $\beta$ -glucosidase overexpressed in *Trichoderma harzianum* under biomass degradation  
488 conditions. *Biotechnol Biofuels.* 2016;9:71.
- 489 7. Filho JAF, Horta MAC, Beloti LL, dos Santos CA, de Souza AP. Carbohydrate-active  
490 enzymes in *Trichoderma harzianum*: a bioinformatic analysis bioprospecting for key  
491 enzymes for the biofuels industry. *BMC Genomics.* 2017;18:779.
- 492 8. Polikarpov I. Structure and function of enzymes and auxiliary proteins from  
493 *Trichoderma*, active in cell-wall hydrolysis/center of biological and industrial process  
494 for biofuels - CeProBIO. São Carlos, SP: IFSC/USP; 2017.
- 495 9. Lopez-Ramirez N, Volke-Sepulveda T, Gaime-Perraud I, Saucedo-Castañeda G,  
496 Favela-Torres E. Effect of stirring on growth and cellulolytic enzymes production by

- 497 *Trichoderma harzianum* in a novel bench-scale solid-state fermentation bioreactor.  
498 Bioresour Technol. 2018;265:291-8.
- 499 10. Santos CA, Morais MAB, Terrett OM, Lyczakowski JJ, Zanphorlin LM, Ferreira-  
500 Filho JA, et al. An engineered GH1 beta-glucosidase displays enhanced glucose  
501 tolerance and increased sugar release from lignocellulosic materials. Sci Rep.  
502 2019;9:4903.
- 503 11. Bischof RH, Ramoni J, Seiboth B. Cellulases and beyond: the first 70 years of the  
504 enzyme producer *Trichoderma reesei*. Microb Cell Fact. 2016;15:106.
- 505 12. Martinez D, Berka RM, Henrissat B, Saloheimo M, Arvas M, Baker SE, et al.  
506 Genome sequencing and analysis of the biomass-degrading fungus *Trichoderma*  
507 *reesei* (*syn. Hypocrea jecorina*). Nat Biotechnol. 2008;26:553-60.
- 508 13. Jun H, Kieselbach T, Jönsson LJ. Enzyme production by filamentous fungi: analysis  
509 of the secretome of *Trichoderma reesei* grown on unconventional carbon source.  
510 Microb Cell Fact. 2011;10:68.
- 511 14. Häkkinen M, Arvas M, Oja M, Aro N, Penttilä M, Saloheimo M, et al. Re-annotation  
512 of the CAZy genes of *Trichoderma reesei* and transcription in the presence of  
513 lignocellulosic substrates. Microb Cell Fact. 2012;11:134.
- 514 15. Alvira P, Gyalai-Korpos M, Barta Z, Oliva JM, Réczey K, Ballesteros M. Production  
515 and hydrolytic efficiency of enzymes from *Trichoderma reesei* iRUTC30 using steam  
516 pretreated wheat straw as carbon source. J Chem Technol Biotechnol. 2013;88:1150-  
517 6.
- 518 16. Li Y-H, Zhang X-Y, Zhang F, Peng L-C, Zhang D-B, Kondo A, et al. Optimization of  
519 cellulolytic enzyme components through engineering *Trichoderma reesei* and on-site  
520 fermentation using the soluble inducer for cellulosic ethanol production from corn  
521 stover. Biotechnol Biofuels. 2018;11:49.

- 522 17. Bischof R, Fourtis L, Limbeck A, Gamauf C, Seiboth B, Kubicek CP. Comparative  
523 analysis of the *Trichoderma reesei* transcriptome during growth on the cellulase  
524 inducing substrates wheat straw and lactose. *Biotechnol Biofuels*. 2013;6:127.
- 525 18. Gupta VK, Steindorff AS, de Paula RG, Silva-Rocha R, Mach-Aigner AR, Mach RL,  
526 et al. The post-genomic era of *Trichoderma reesei*: what's next? *Trends Biotechnol*.  
527 2016;34:970-82.
- 528 19. Santos CA, Ferreira-Filho JA, O'Donovan A, Gupta VK, Tuohy MG, Souza AP.  
529 Production of a recombinant swollenin from *Trichoderma harzianum* in *Escherichia*  
530 *coli* and its potential synergistic role in biomass degradation. *Microb Cell Fact*.  
531 2017;16:83.
- 532 20. Villares A, Moreau C, Bennati-Granier C, Garajova S, Foucat L, Falourd X, et al.  
533 Lytic polysaccharide monooxygenases disrupt the cellulose fibers structure. *Sci Rep*.  
534 2017;7:40262.
- 535 21. Benocci T, Aguilar-Pontes MV, Zhou M, Seiboth B, de Vries RP. Regulators of plant  
536 biomass degradation in *Ascomycetous fungi*. *Biotechnol Biofuels*. 2017;10:152.
- 537 22. Coradetti ST, Craig JP, Xiong Y, Shock T, Tian C, Glass NL. Conserved and essential  
538 transcription factors for cellulase gene expression in ascomycete *Fungi*. *Proc Natl*  
539 *Acad Sci U S A*. 2012;109:7397-402.
- 540 23. Liu F, Xue Y, Liu J, Gan L, Long M. ACE3 as a master transcriptional factor  
541 regulates cellulase and xylanase production in *Trichoderma orientalis* EU7-22.  
542 *BioResources*. 2018;13:6790-801.
- 543 24. Crucello A, Sforça DA, Horta MAC, dos Santos CA, Viana AJC, Beloti LL, et al.  
544 Analysis of genomic regions of *Trichoderma harzianum* IOC-3844 related to biomass  
545 degradation. *PLoS One*. 2015;10:e0122122.

- 546 25. Himmel ME, Ding S-Y, Johnson DK, Adney WS, Nimlos MR, Brady JW, et al.  
547 Biomass recalcitrance: engineering plants and enzymes for biofuels production.  
548 Science. 2007;315:804-7.
- 549 26. van den Brink J, de Vries RP. Fungal enzyme sets for plant polysaccharide  
550 degradation. Appl Microbiol Biotechnol. 2011;91:1477-92.
- 551 27. Van Dyk JS, Pletschke BI. A review of lignocellulose bioconversion using enzymatic  
552 hydrolysis and synergistic cooperation between enzymes—Factors affecting enzymes,  
553 conversion and synergy. Biotechnol Adv. 2012;30:1458-80.
- 554 28. Nitta M, Furukawa T, Shida Y, Mori K, Kuhara S, Morikawa Y, et al. A new Zn (II)  
555 2Cys6-type transcription factor BglR regulates  $\beta$ -glucosidase expression in  
556 *Trichoderma reesei*. Fungal Genet Biol. 2012;49:388-97.
- 557 29. Häkkinen M, Valkonen MJ, Westerholm-Parvinen A, Aro N, Arvas M, Vitikainen M,  
558 et al. Screening of candidate regulators for cellulase and hemicellulase production in  
559 *Trichoderma reesei* and identification of a factor essential for cellulase production.  
560 Biotechnol Biofuels. 2014;7:14.
- 561 30. Westereng B, Loose JS, Vaaje-Kolstad G, Aachmann FL, Sørli M, Eijsink VG.  
562 Analytical tools for characterizing cellulose-active lytic polysaccharide  
563 monoxygenases (LPMOs). Methods Mol Biol. 2018;1796:219-46.
- 564 31. Toyotome T, Hamada S, Yamaguchi S, Takahashi H, Kondoh D, Takino M, et al.  
565 Comparative genome analysis of *Aspergillus flavus* clinically isolated in Japan. DNA  
566 Res. 2018;26:95-103.
- 567 32. Baroncelli R, Piaggese G, Fiorini L, Bertolini E, Zapparata A, Pè ME, et al. Draft  
568 whole-genome sequence of the biocontrol agent *Trichoderma harzianum* T6776.  
569 Genome Announc. 2015;3:e00647-15.

- 570 33. Kubicek CP, Steindorff AS, Chenthamara K, Manganiello G, Henrissat B, Zhang J, et  
571 al. Evolution and comparative genomics of the most common *Trichoderma* species.  
572 BMC Genomics. 2019;20:485.
- 573 34. Li W-C, Huang C-H, Chen C-L, Chuang Y-C, Tung S-Y, Wang T-F. *Trichoderma*  
574 *reesei* complete genome sequence, repeat-induced point mutation, and partitioning of  
575 CAZyme gene clusters. Biotechnol Biofuels. 2017;10:170.
- 576 35. Horta MAC, Filho JAF, Murad NF, Santos EO, dos Santos CA, Mendes JS, et al.  
577 Network of proteins, enzymes and genes linked to biomass degradation shared by  
578 *Trichoderma* species. Sci Rep. 2018;8:1341.
- 579 36. Kuan CS, Yew SM, Toh YF, Chan CL, Ngeow YF, Lee KW, et al. Dissecting the  
580 fungal biology of *Bipolaris papendorffii*: from phylogenetic to comparative genomic  
581 analysis. DNA Res. 2015;22:219-32.
- 582 37. Haitjema CH, Gilmore SP, Henske JK, Solomon KV, de Groot R, Kuo A, et al. A  
583 parts list for fungal cellulosomes revealed by comparative genomics. Nat Microbiol.  
584 2017;2:17087.
- 585 38. Wang R, Dong L, He R, Wang Q, Chen Y, Qu L, et al. Comparative genomic  
586 analyses reveal the features for adaptation to nematodes in *Fungi*. DNA Res.  
587 2018;25:245-56.
- 588 39. Xie B-B, Qin Q-L, Shi M, Chen L-L, Shu Y-L, Luo Y, et al. Comparative genomics  
589 provide insights into evolution of *Trichoderma* nutrition style. Genome Biol Evol.  
590 2014;6:379-90.
- 591 40. Hassan L, Lin L, Sorek H, Sperl LE, Goudoulas T, Hagn F, et al. Crosstalk of  
592 cellulose and mannan perception pathways leads to inhibition of cellulase production  
593 in several *Filamentous fungi*. MBio. 2019;10:e00277-19.



- 594 41. Ivanova C, Ramoni J, Aouam T, Frischmann A, Seiboth B, Baker SE, et al. Genome  
595 sequencing and transcriptome analysis of *Trichoderma reesei* QM9978 strain reveals  
596 a distal chromosome translocation to be responsible for loss of *vib1* expression and  
597 loss of cellulase induction. *Biotechnol Biofuels*. 2017;10:209.
- 598 42. Lawler K, Hammond-Kosack K, Brazma A, Coulson RM. Genomic clustering and  
599 co-regulation of transcriptional networks in the pathogenic fungus *Fusarium*  
600 *graminearum*. *BMC Syst Biol*. 2013;7:52.
- 601 43. Castro LDS, Pedersoli WR, Antoniêto ACC, Steindorff AS, Silva-Rocha R, Martinez-  
602 Rossi NM, et al. Comparative metabolism of cellulose, sophorose and glucose in  
603 *Trichoderma reesei* using high-throughput genomic and proteomic analyses.  
604 *Biotechnol Biofuels*. 2014;7:41.
- 605 44. Berlin K, Koren S, Chin C-S, Drake JP, Landolin JM, Phillippy AM. Assembling  
606 large genomes with single-molecule sequencing and locality-sensitive hashing. *Nat*  
607 *Biotechnol*. 2015;33:623-30.
- 608 45. Myers EW, Sutton GG, Delcher AL, Dew IM, Fasulo DP, Flanigan MJ, et al. A  
609 whole-genome assembly of *Drosophila*. *Science*. 2000;287:2196-204.
- 610 46. Chaisson MJ, Tesler G. Mapping single molecule sequencing reads using basic local  
611 alignment with successive refinement (BLASR): application and theory. *BMC*  
612 *Bioinformatics*. 2012;13:238.
- 613 47. Chin C-S, Alexander DH, Marks P, Klammer AA, Drake J, Heiner C, et al.  
614 Nonhybrid, finished microbial genome assemblies from long-read SMRT sequencing  
615 data. *Nat Methods*. 2013;10:563-9.
- 616 48. Salamov AA, Solovyev VV. Ab initio gene finding in *Drosophila* genomic DNA.  
617 *Genome Res*. 2000;10:516-22.

- 618 49. Conesa A, Götz S, García-Gómez JM, Terol J, Talón M, Robles M. Blast2GO: a  
619 universal tool for annotation, visualization and analysis in functional genomics  
620 research. *Bioinformatics*. 2005;21:3674-6.
- 621 50. Mitchell A, Chang H-Y, Daugherty L, Fraser M, Hunter S, Lopez R, et al. The  
622 InterPro protein families database: the classification resource after 15 years. *Nucleic  
623 Acids Res*. 2015;43:D213-21.
- 624 51. Kurtz S, Phillippy A, Delcher AL, Smoot M, Shumway M, Antonescu C, et al.  
625 Versatile and open software for comparing large genomes. *Genome Biol*. 2004;5:R12.
- 626 52. Veltri D, Wight MM, Crouch JA. Simple synteny: a web-based tool for visualization  
627 of microsynteny across multiple species. *Nucleic Acids Res*. 2016;44:W41-5.
- 628 53. Thompson JD, Higgins DG, Gibson TJ. CLUSTAL W: improving the sensitivity of  
629 progressive multiple sequence alignment through sequence weighting, position-  
630 specific gap penalties and weight matrix choice. *Nucleic Acids Res*. 1994;22:4673-80.
- 631 54. Kumar S, Stecher G, Tamura K. MEGA7: molecular evolutionary genetics analysis  
632 version 7.0 for bigger datasets. *Mol Biol Evol*. 2016;33:1870-4.
- 633 55. Jones DT, Taylor WR, Thornton JM. The rapid generation of mutation data matrices  
634 from protein sequences. *Comput Appl Biosci*. 1992;8:275-82.
- 635 56. Felsenstein J. Confidence limits on phylogenies: an approach using the bootstrap.  
636 *Evolution*. 1985;39:783-91.
- 637 57. Källberg M, Margaryan G, Wang S, Ma J, Xu J. RaptorX server: a resource for  
638 template-based protein structure modeling. In: Kihara D, editor. *Protein structure  
639 prediction*. New York, NY: Springer; 2014. p. 17-27.
- 640 58. CLC Genomics Workbench 9.0. Qiagen (Aarhus A/S). Manual for CLC genomics  
641 workbench 9.0 windows, Mac OS X and Linux Denmark. 2016.

- 642 59. Wilczynski B, Dojer N. BNFinder: exact and efficient method for learning bayesian  
643 networks. *Bioinformatics*. 2009;25:286-7.
- 644 60. Shannon P, Markiel A, Ozier O, Baliga NS, Wang JT, Ramage D, et al. Cytoscape: a  
645 software environment for integrated models of biomolecular interaction networks.  
646 *Genome Res*. 2003;13:2498-504.
- 647
- 648
- 649
- 650
- 651
- 652
- 653
- 654
- 655
- 656
- 657
- 658
- 659
- 660
- 661
- 662
- 663
- 664
- 665
- 666

667 **Figure legends**

668 **Figure 1.** Distribution of the *T. harzianum* IOC3844 genes on the 1 Mb intervals of the seven  
669 chromosomes of *T. reesei* QM6a. CAZyme genes of *T. harzianum* IOC3844 are in red,  
670 CAZymes genes of *T. reesei* are in blue, and all genes of *T. harzianum* IOC3844 are in green.  
671 Th: *T. harzianum* IOC3844; Tr: *T. reesei* QM6a.

672 **Figure 2.** Functional annotation of the genes predicted in the genomic regions of *T.*  
673 *harzianum* IOC3844. Annotation of genes for gene ontologies for biological processes,  
674 cellular components and molecular functions. (a) Distribution of enzymes annotated  
675 according to enzyme commission (b) and major enzyme commission (EC) related to cellulose  
676 and hemicellulose degradation (c).

677 **Figure 3.** CAZy classification of genes annotated in the genomic regions of *T. harzianum*  
678 IOC3844. GH: glycoside hydrolases; GT: glycosyl transferases; PLs: polysaccharide lyases;  
679 CEs: carbohydrate esterases; AA: auxiliary activities; CBM: carbohydrate-binding modules.

680 **Figure 4.** Comparison between the gene clusters of *T. harzianum* IOC3844 and those of other  
681 species of the genus *Trichoderma* spp. GH1: glycoside hydrolase 1; GH4: glycoside  
682 hydrolase 4; MFS: major facilitator superfamily permease; Trans: putative transporter; TF-1:  
683 putative transcription factor 1; GT38: glycosyl transferases 4; CBM18: carbohydrate-binding  
684 modules 18; TF-2: putative transcription factor 2; CLR2: cellulose regulator 2; GH2:  
685 glycoside hydrolase 2; GH26: glycoside hydrolase 26; Th: *T. harzianum*; Tv: *T. virens*; Ta: *T.*  
686 *atroviride*; Tr: *T. virens*.

687 **Figure 5.** Molecular phylogeny of the CLR2 transcription factor in Ascomycota and  
688 Basidiomycota (a); *in silico* protein modeling for CLR2 in *T. harzianum* IOC3844 (b) and *T.*  
689 *reesei* QM6a (c).

690 **Figure 6.** Subnetwork of CLR2 transcription factors and related genes (a) and network of  
691 induced (blue) and repressed (red) genes under cellulose conditions (b). CLR2: cellulose  
692 regulator 2; GH: glycoside hydrolases; GT: glycosyl transferases; AA: auxiliary activities.

693 **Figure 7.** Molecular scheme of the enzymatic model in the degradation of cellulose in  
694 *Trichoderma* spp. Enzymes and PDB code: beta-glucosidase ([5BWF](#)), cellobiohydrolase I  
695 ([2YOK](#)), cellobiohydrolase II ([1CB2](#)), endoglucanase 3 ([4H7M](#)), copper-dependent lytic  
696 polysaccharide mono-oxygenases (LPMOs) ([5O2W](#)).

697

698

699

700

701

702

703

704

705

706

707

708

709

710

711

712

713

714

715

716

717

718

719 **Table 1.** Proteins identified in genomic and in the *T. harzianum* IOC3844 secretome under  
 720 cellulose growth conditions.

| <b>IDs*</b> | <b>Protein name</b>              | <b>Secretome/UniProt ID</b> | <b>CAZy family</b> | <b>CEL (TPM)</b> | <b>GLI (TPM)</b> |
|-------------|----------------------------------|-----------------------------|--------------------|------------------|------------------|
| 1010        | Hypothetical protein             | A0A0G0ALT6                  | GH28               | 14.2             | 6.2              |
| 1043        | Cellulosome enzyme               | A0A0G0A296                  | GH30               | 35.6             | 11.5             |
| 1054        | Glycosyl hydrolase<br>10         | A0A0F9X8A4                  | GH10               | 14.8             | 4.1              |
| 1075        | Glycosyl hydrolase<br>64         | A0A0F9ZIR5                  | GH64               | 824.3            | 262.4            |
| 1095        | Glycosyl hydrolase<br>18         | A0A0F9ZHI0                  | GH18               | 83.2             | 47.9             |
| 11          | Mutanase                         | A0A0F9XN06                  | CBM24              | 2741.6           | 1452.9           |
| 1133        | Glycosyl hydrolase<br>12         | A0A0F9Y2E9                  | GH12               | 1579.8           | 308.2            |
| 1150        | Glycosyl hydrolase<br>47         | A0A0F9WYR7                  | GH47               | 83.9             | 74.6             |
| 1217        | Beta-mannosidase                 | A0A0F9ZDV4                  | GH2                | 117.9            | 124.2            |
| 126         | Glycosyl hydrolase<br>76         | A0A0F9X1Q3                  | GH76               | 616.7            | 375.4            |
| 1318        | Beta-xylosidase                  | A0A0G0A408                  | GH3                | 172.3            | 125.2            |
| 1439        | Alpha-L-arabinofuranosidase<br>B | A0A0G0A4Q2                  | CBM42              | 450.4            | 343.5            |
| 1440        | Glycosyl hydrolase 3             | A0A0F9XRC5                  | GH3                | 245.8            | 107.4            |
| 1498        | WSC domain-containing            | A0A0F9ZXC9                  | AA5_1              | 342.5            | 339.0            |
| 44          | Beta-1,3-                        | A0A0F9ZKA8                  | GH72               | 2431.7           | 3210.5           |

| glucanotransferase |                                      |            |           |        |        |
|--------------------|--------------------------------------|------------|-----------|--------|--------|
| 441                | Alpha-glucosidase                    | A0A0G0AG54 | GH31      | 2121.6 | 1655.2 |
| 559                | Alpha-1,2-mannosidase                | A0A0G0ABI9 | GH92      | 226.9  | 153.4  |
| 666                | Glycosyl hydrolase 3                 | A0A0F9XQT4 | GH3       | 77.2   | 43.0   |
| 667                | Hypothetical protein                 | A0A0G0AME2 | CBM1      | 874.9  | 142.8  |
| 668                | Glycosyl hydrolase 61                | A0A0F9XMI8 | AA9       | 3109.7 | 625.1  |
| 669                | Glycosyl hydrolase 16                | A0A0F9XP75 | CBM13     | 16.4   | 3.7    |
| 671                | Cytochrome P450 monooxygenase        | A0A0G0A4Z5 | GT4       | 1569.5 | 1595.3 |
| 681                | Glycosyl hydrolase 11                | A0A0F9Y0Y9 | GH11/CBM1 | 4206.8 | 1316.1 |
| 741                | Endo-N-acetyl-beta-D-glucosaminidase | A0A0F9ZHA7 | GH18      | 3971.9 | 2328.0 |
| 759                | Hypothetical protein                 | A0A0F9ZJ74 | GH20      | 1184.8 | 1507.7 |
| 813                | Catalase peroxidase                  | A0A0F9X3Z8 | AA2       | 2677.7 | 2473.4 |
| 82                 | Glycosyl hydrolase 6                 | A0A0G0AEM7 | GH6/CBM1  | 5843.5 | 1567.4 |
| 842                | Hypothetical protein                 | A0A0F9XY55 | GH45/CBM1 | 41.3   | 15.3   |
| 9                  | Glycosyl hydrolase 62                | A0A0F9X8Z0 | GH62      | 353.9  | 103.4  |
| 913                | Isoamyl alcohol oxidase              | A0A0F9XC99 | AA7       | 39.3   | 13.2   |
| 918                | Hypothetical protein                 | A0A0F9XG06 | GH5_5     | 870.8  | 750.9  |

721 \*The annotated genes IDs can be found in Supplementary Table S4

722

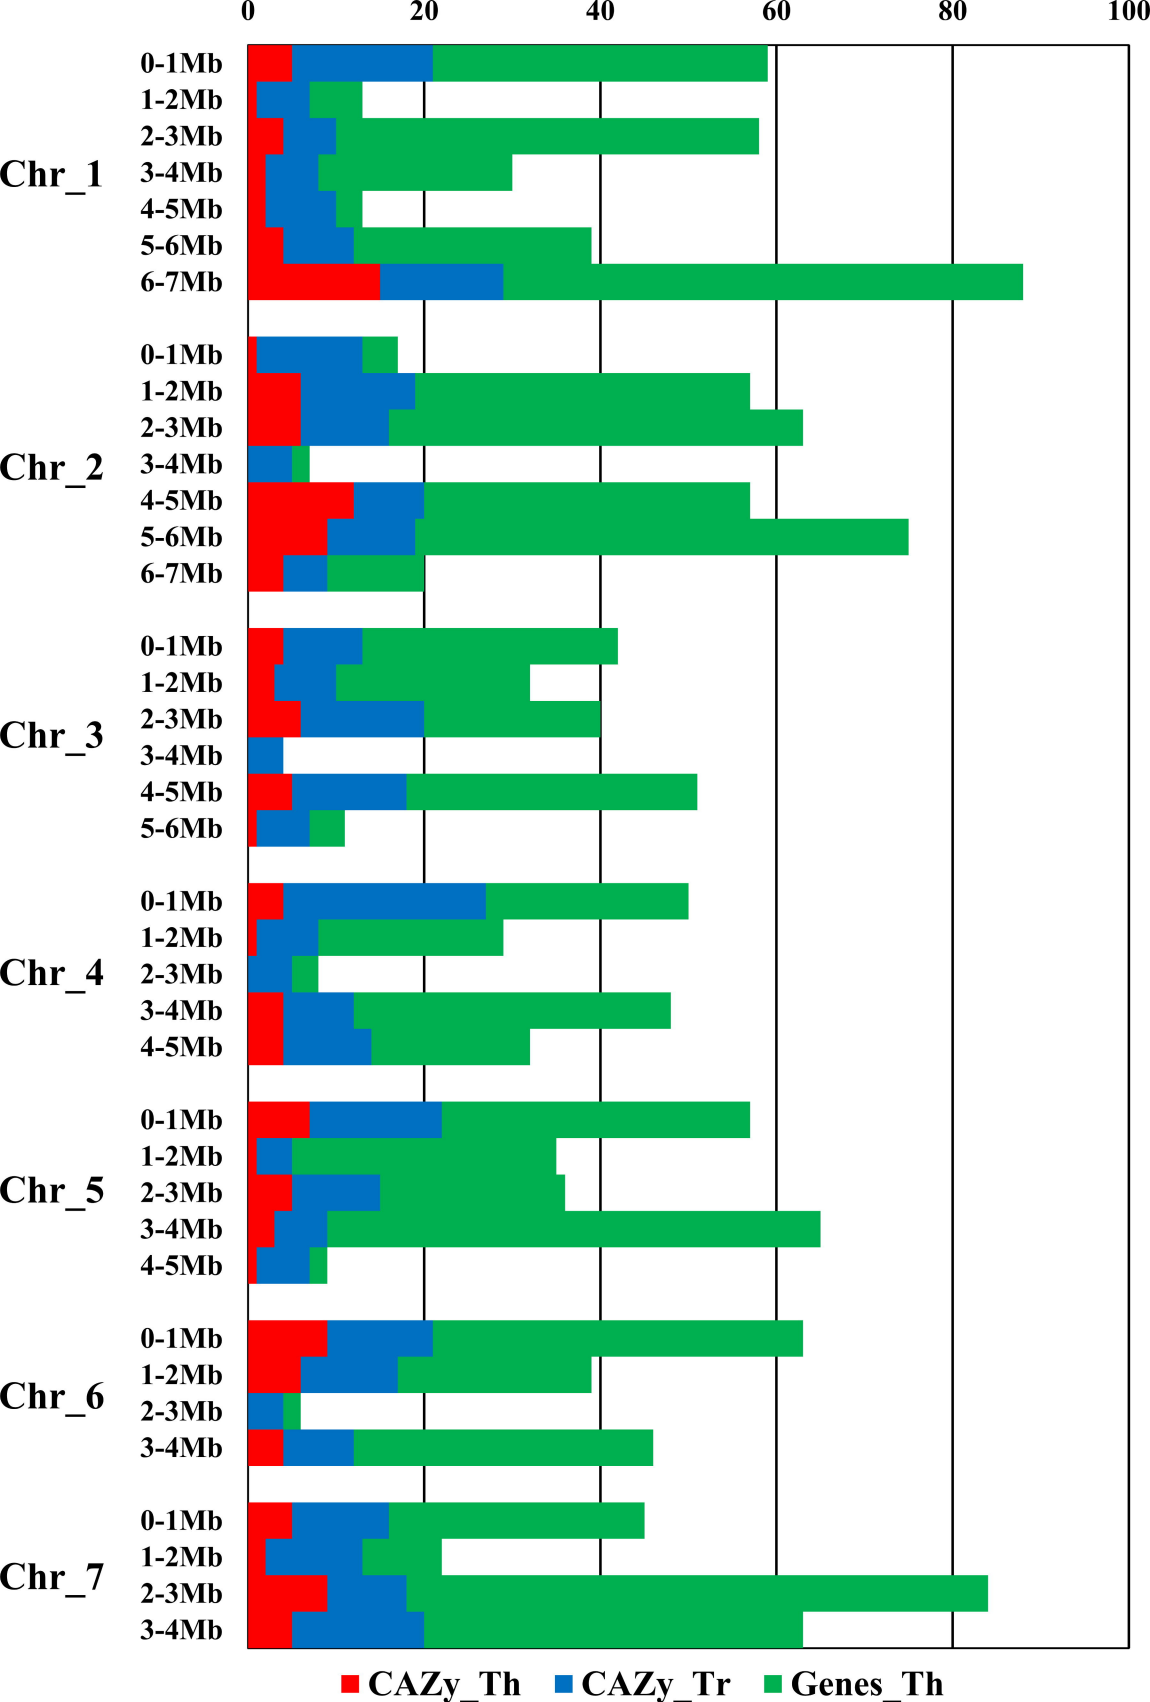



a

## Biological Process

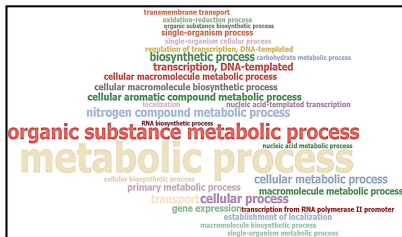

## Cellular Component

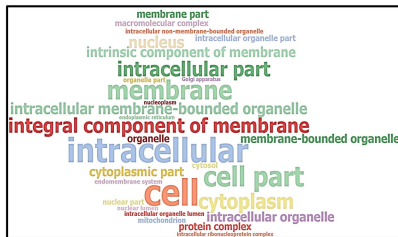

## Molecular Function

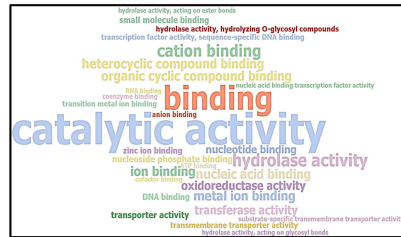

b

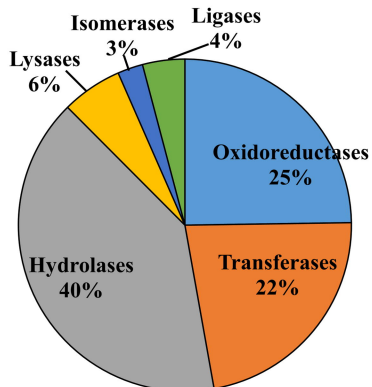

c

$\alpha$ -L-arabinofuranosidase EC 3.2.1.55  
 endo-1,4- $\beta$ -xylanase EC 3.2.1.8  
 cellobiohydrolase EC 3.2.1.91  
 endo- $\beta$ -1,4-glucanase EC 3.2.1.4  
 $\beta$ -glucosidase EC 3.2.1.21

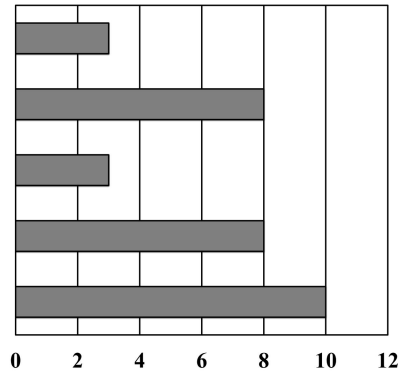

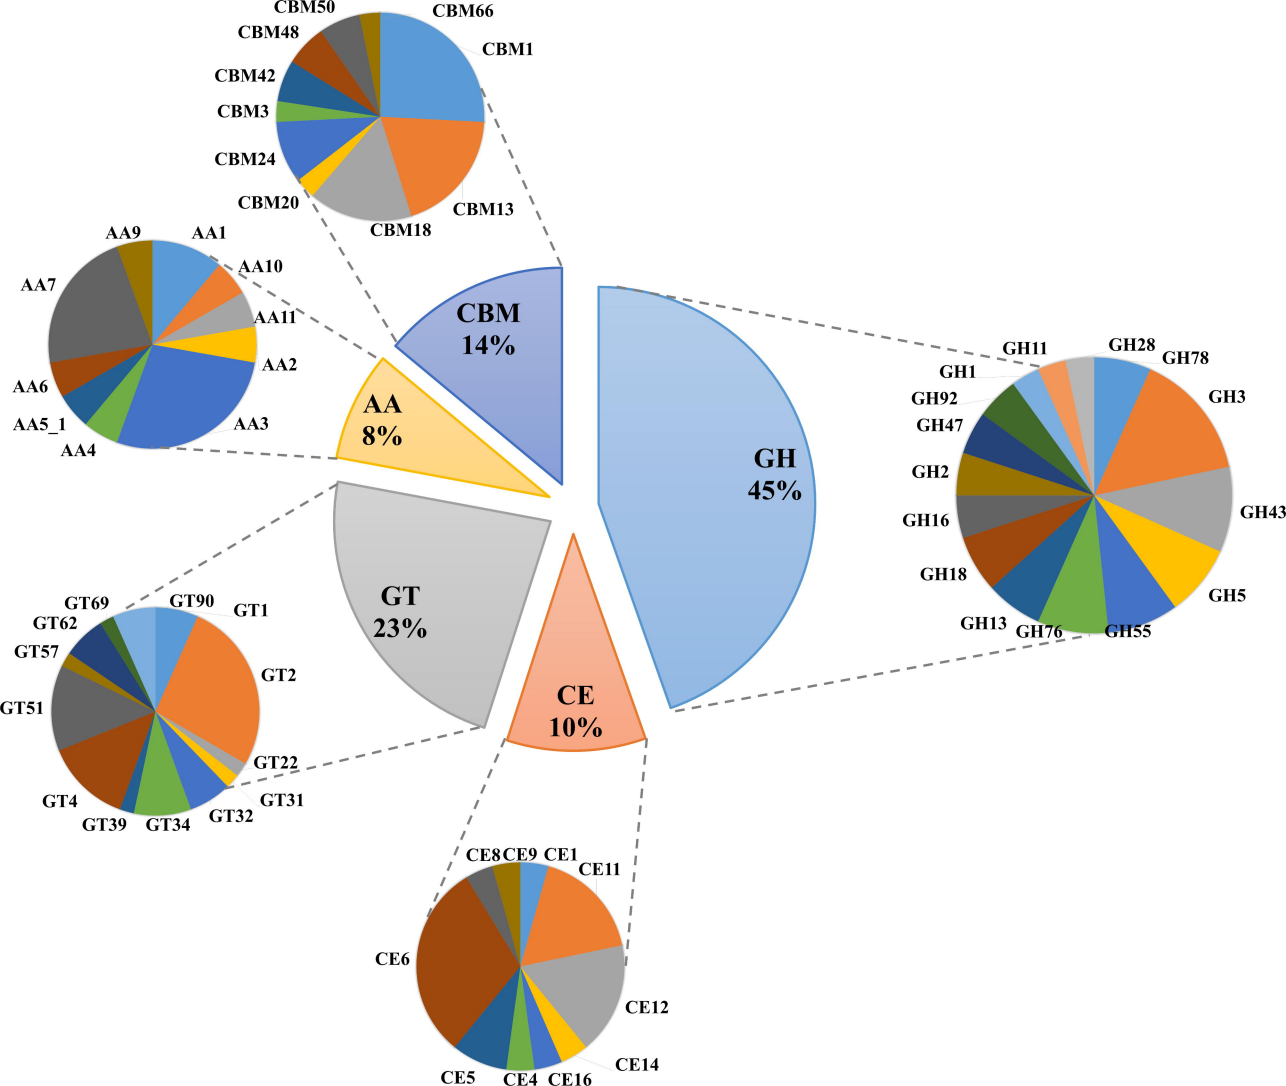

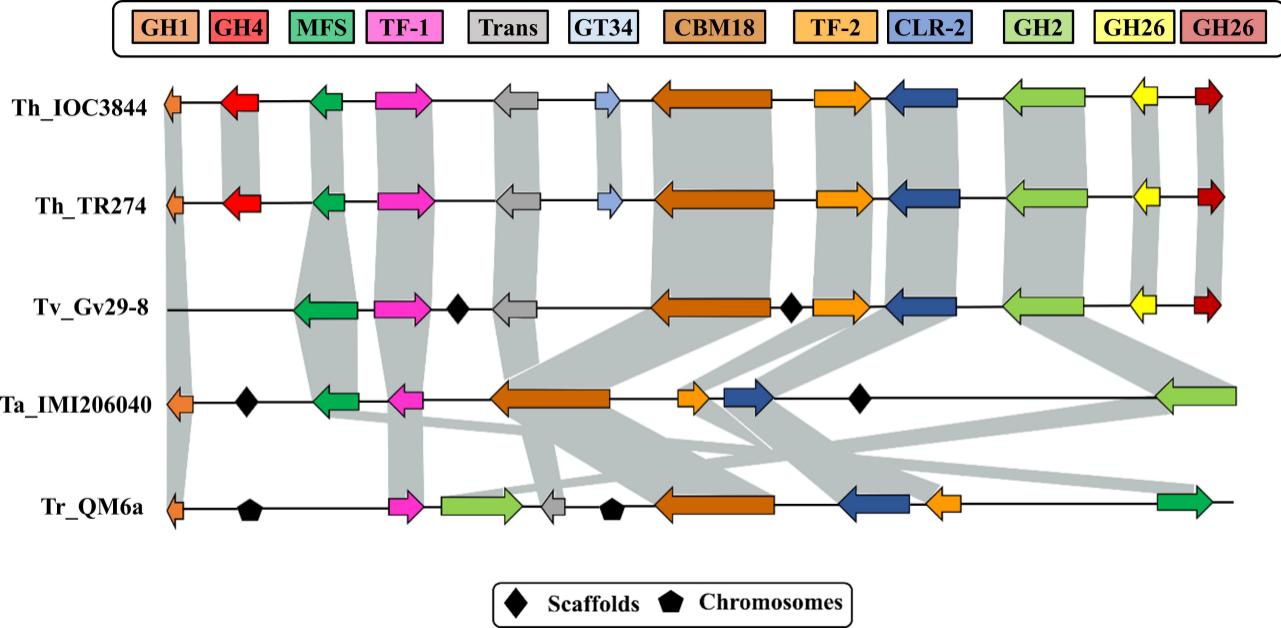

# Cellulose Degradation Regulator 2 (CLR2)

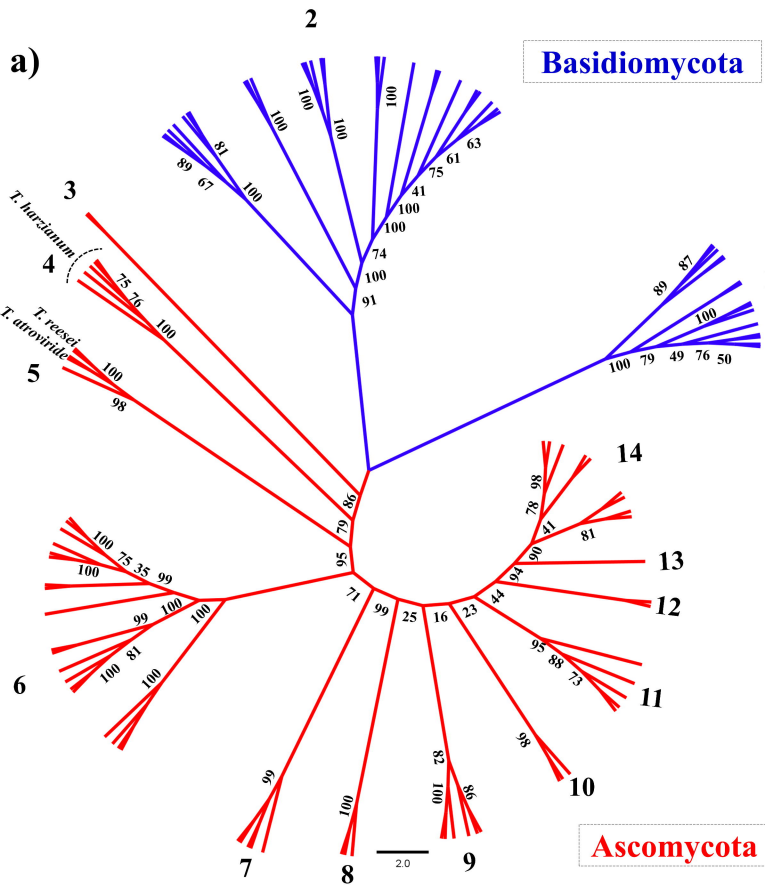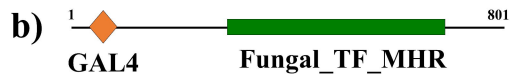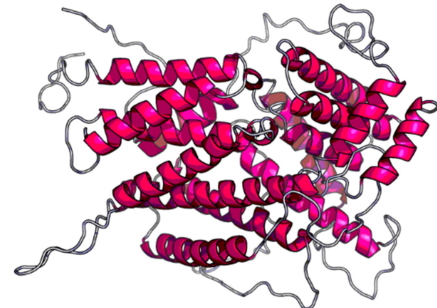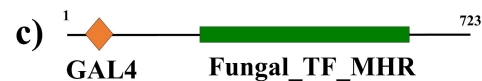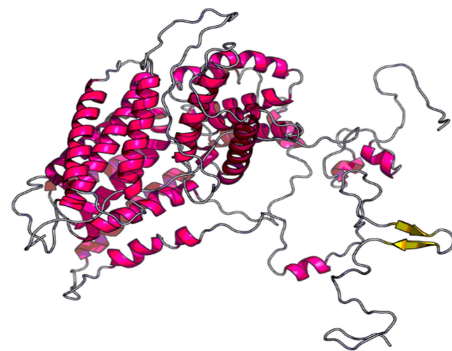

**a**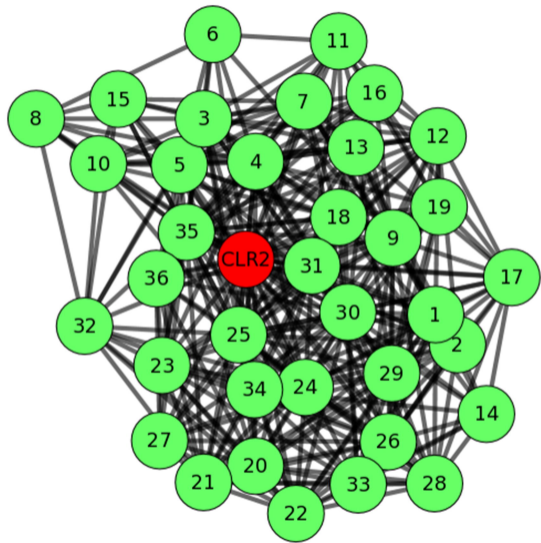**b**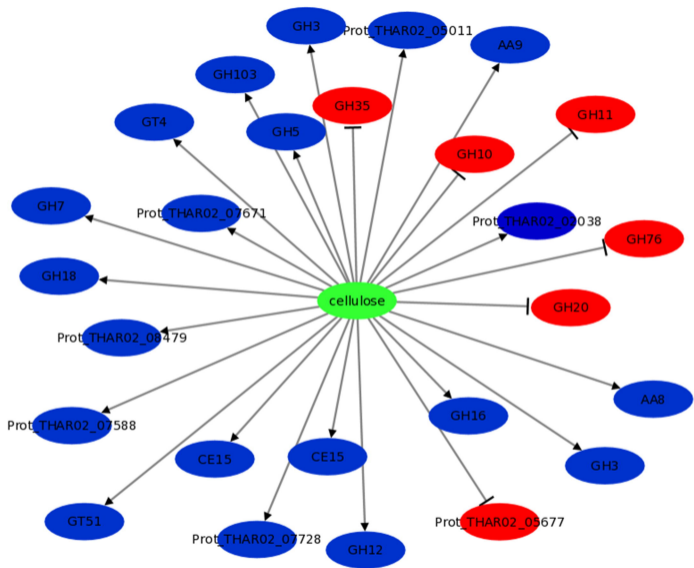

■ Cellulose-induced genes ■ Cellulose-repressed genes

# Cellulose Degradation

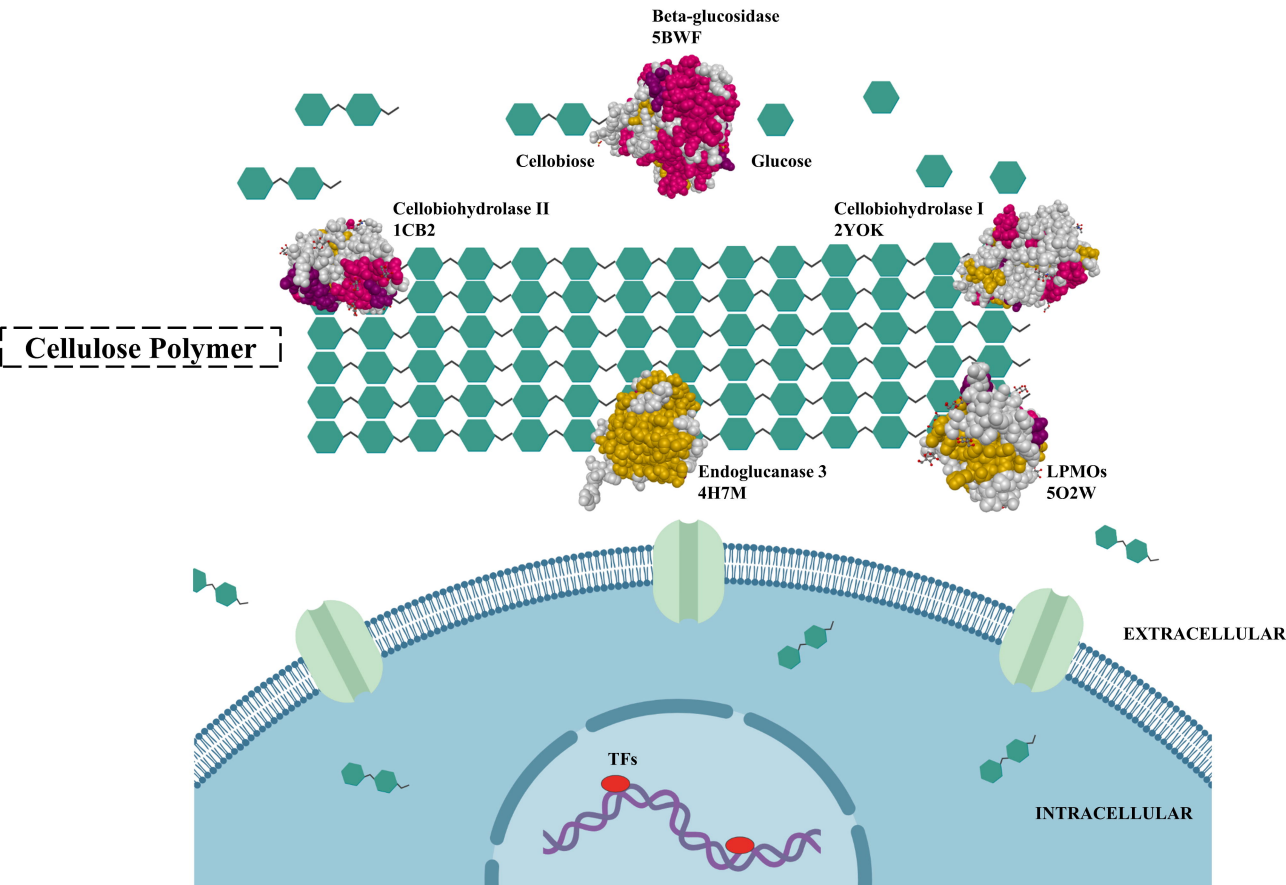

| CAZy family | <i>T. harzianum</i> | <i>T. reesei</i> |
|-------------|---------------------|------------------|
| GH1         | 4                   | 2                |
| GH3         | 17                  | 13               |
| GH6         | 1                   | 1                |
| GH7         | 2                   | 2                |
| GH12        | 3                   | 2                |
| GH45        | 3                   | 1                |
| AA9         | 4                   | 3                |
