# Supplementary material for: “Integrative Genomic Analysis for the Bioprospection of Regulators and Accessory Enzymes Associated with Cellulose Degradation in a Filamentous Fungus (Trichoderma harzianum)”
Source: bioRxiv or medRxiv preprint supplement (doi:10.1101/731323), 2019-08-21
Supplement: Supplementary file [file media-1.pdf]

**“Integrative Genomic Analysis for the Bioprospection of Regulators and Accessory Enzymes Associated with Cellulose Degradation in a Filamentous Fungus (*Trichoderma harzianum*)”**

Jaire A. Ferreira Filho<sup>1,2</sup>, Maria Augusta C. Horta<sup>1,3</sup>, Clelton A. dos Santos<sup>1</sup>, Deborah A. Almeida<sup>1,2</sup>, Natália F. Murad<sup>1</sup>, Juliano S. Mendes<sup>1</sup>, Danilo A. Sforça<sup>1</sup>, Claudio Benício C. Silva<sup>1</sup>, Aline Crucello<sup>1</sup>, Anete P. de Souza<sup>1,4,\*</sup>

<sup>1</sup>Center for Molecular Biology and Genetic Engineering (CBMEG), University of Campinas (UNICAMP), Campinas, SP, Brazil

<sup>2</sup>Graduate Program in Genetics and Molecular Biology, Institute of Biology, UNICAMP, Campinas, SP, Brazil

<sup>3</sup>Holzforshung München, TUM School of Life Sciences Weihenstephan, Technische Universität München, 85354 Freising, Germany

<sup>4</sup>Department of Plant Biology, Institute of Biology, UNICAMP, Campinas, SP, Brazil

**Supplementary data**

**This PDF file includes:**

Figs S1 to S3

Tables S2, S3, S8 and S9

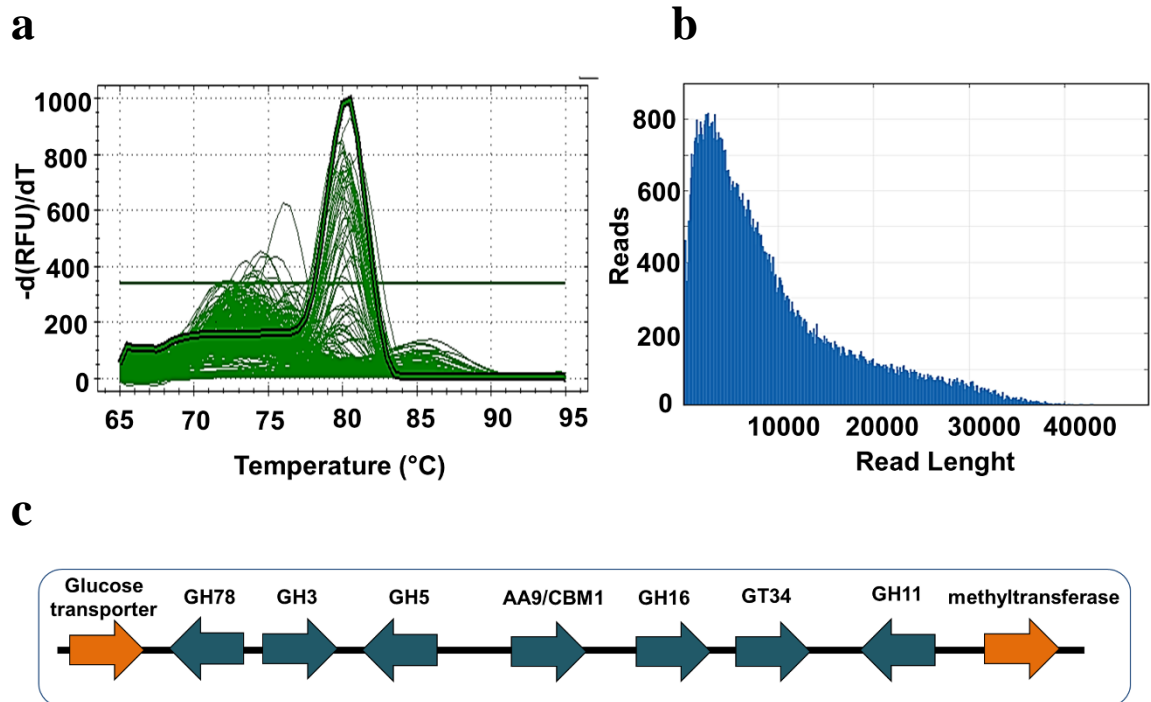

**Fig. S1.** Screening genes of interest in the genomic library of *T. harzianum* IOC3844 by qPCR (a); reads size sequenced using PACBio technology (b); genes cluster in a genomic region of *T. harzianum* (c).

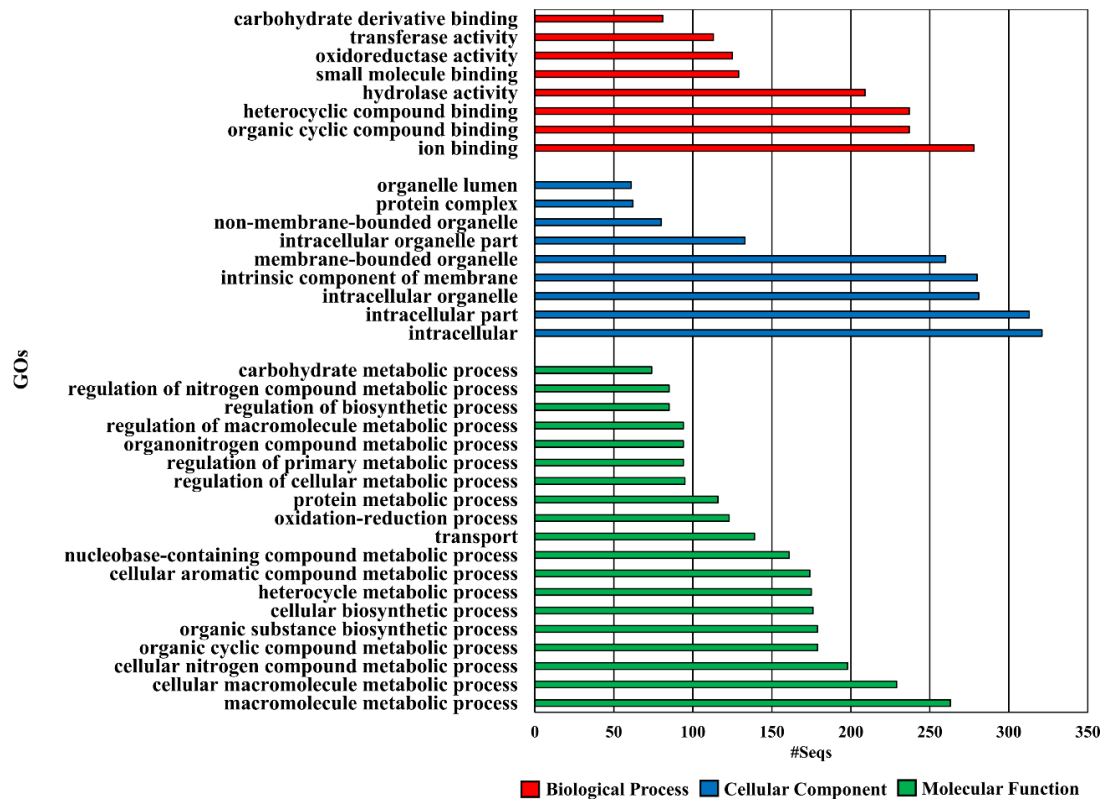

**Fig. S2.** Distribution of the main GO terms of the annotated genes in *T. harzianum* IOC3844.

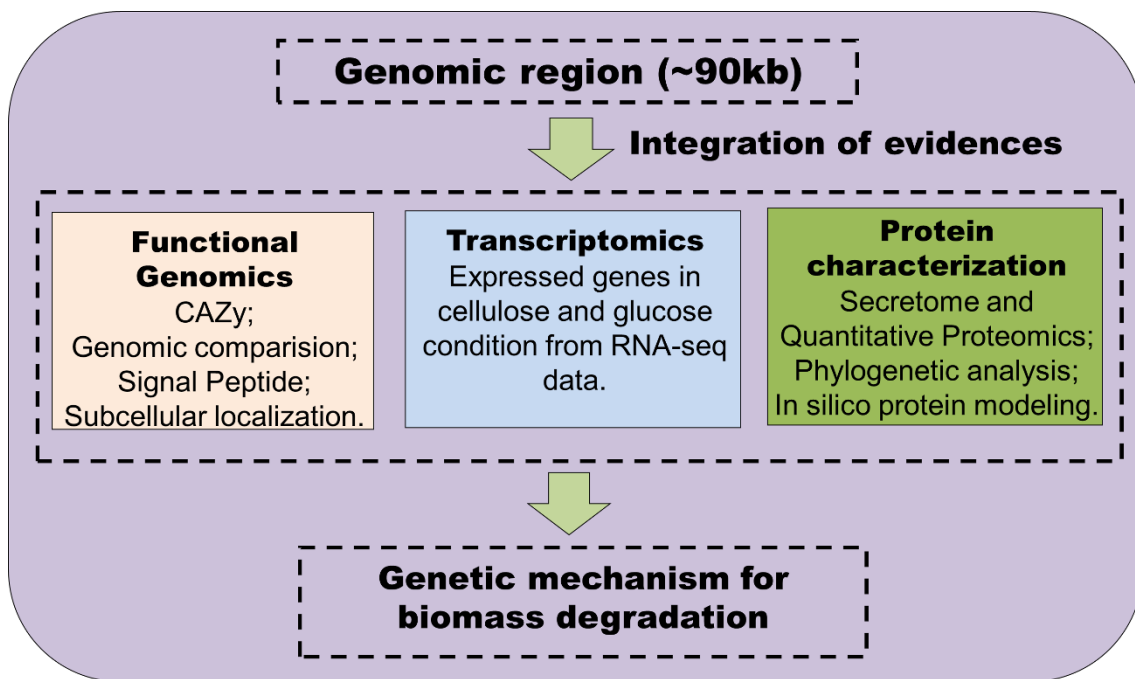

**Fig. S3.** Pipeline approach for the analyzes used in this work of genes and genomic study in *T. harzianum*.

**Supplementary Table S2.** Assembly parameters of a set of sequenced genomic region using PACBio technology.

| <b>Parameters</b>         | <b>Results</b> |
|---------------------------|----------------|
| Polymerase Read Bases     | 1151876133     |
| Seed Bases                | 150009116      |
| Pre-Assembly Yield        | 0.296          |
| Pre-Assembly Reads Length | 5528           |
| Length Cutoff             | 12815          |
| Pre-Assembly bases        | 44419992       |
| Pre-Assembly Reads        | 8035           |
| Pre-Assembly N50          | 8199           |
| Mean Read Score           | 0.667          |
| Number of Reads           | 100732         |
| Mean Read Length          | 11493          |
| Number of bases           | 1157715225     |
| N50 Read Length           | 17608          |
| Polymerase Read Quality   | 0.849          |

**Supplementary Table S3.** Comparison of genomic data among different species of *Trichoderma* spp.

| Organism/Name        | Strain     | Genome type     | Size (Mb) | GC%   | Scaffolds | CAZymes |
|----------------------|------------|-----------------|-----------|-------|-----------|---------|
| <i>T. harzianum</i>  | IOC3844    | BACs            | 5.00      | 49.65 | 63        | 222     |
| <i>T. harzianum</i>  | T6776      | Draft           | 40.98     | 48.50 | 1572      | 430     |
| <i>T. reesei</i>     | QM6a       | Complete genome | 33.39     | 52.80 | 7         | 327     |
| <i>T. atroviride</i> | IMI 206040 | Draft           | 36.14     | 49.70 | 29        | 422     |
| <i>T. virens</i>     | Gv29-8     | Draft           | 39.00     | 49.20 | 93        | 441     |

**Supplementary Table S8.** Description of the species used for the phylogenetic analysis of the transcription factor CLR2.

| Group          | Sequence ID    | Species                                                   |
|----------------|----------------|-----------------------------------------------------------|
| 1              | XP_012182108.1 | <i>Fibroporia radiculosa</i>                              |
|                | KZT72632.1     | <i>Daedalea quercina</i> L-15889                          |
|                | PCH41399.1     | <i>Wolfiporia cocos</i> MD-104 SS10                       |
|                | XP_024336022.1 | <i>Postia placenta</i> MAD-698-R-SB12                     |
|                | OCH94255.1     | <i>Obba rivulosa</i>                                      |
|                | PSR73669.1     | <i>Phlebia centrifuga</i>                                 |
|                | XP_007392271.1 | <i>Phanerochaete carnosae</i> HHB-10118                   |
|                | XP_008035817.0 | <i>Trametes versicolor</i> FP-101664 SS1                  |
|                | XP_007364283.1 | <i>Dichomitus squalens</i> LYAD-421                       |
|                | OJA15282.1     | <i>Rhizopogon vesiculosus</i>                             |
|                | OAX40653.1     | <i>Rhizopogon vinicolor</i> AM-OR11-026                   |
|                | KIJ70318.1     | <i>Hydnomerulius pinastri</i> MD-312                      |
|                | KIK30790.1     | <i>Pisolithus microcarpus</i> 441                         |
|                | KIO13022.1     | <i>Pisolithus tinctorius</i> Marx 270                     |
|                | 2              | OXG14340.1                                                |
| OWZ51650.1     |                | <i>Cryptococcus neoformans</i> var. <i>grubii</i> 125.91  |
| OXG77158.1     |                | <i>Cryptococcus neoformans</i> var. <i>grubii</i> Br795   |
| OWZ35064.1     |                | <i>Cryptococcus neoformans</i> var. <i>grubii</i> AD1-83a |
| XP_012051901.1 |                | <i>Cryptococcus neoformans</i> var. <i>grubii</i> H99     |
| OWT36835.1     |                | <i>Cryptococcus neoformans</i> var. <i>grubii</i> Bt1     |
| OXG13205.1     |                | <i>Cryptococcus neoformans</i> var. <i>grubii</i> Tu401-1 |
| OWZ76252.1     |                | <i>Cryptococcus neoformans</i> var. <i>grubii</i> Bt85    |
| OXM75578.1     |                | <i>Cryptococcus neoformans</i> var. <i>grubii</i> Bt63    |
| XP_018260593.1 |                | <i>Kwoniella dejecticola</i> CBS 10117                    |
| XP_018999125.1 |                | <i>Kwoniella mangroviensis</i> CBS 8507                   |
| XP_019045940.1 |                | <i>Kwoniella bestiolae</i> CBS 10118                      |
| XP_019014217.1 |                | <i>Kwoniella pini</i> CBS 10737                           |
| XP_018266380.1 |                | <i>Kwoniella dejecticola</i> CBS 10117                    |
| OCF60695.1     |                | <i>Kwoniella mangroviensis</i> CBS 10435                  |
| OCF74556.1     |                | <i>Kwoniella mangroviensis</i> CBS 8886                   |
| XP_019001153.1 |                | <i>Kwoniella mangroviensis</i> CBS 8507                   |
| XP_021869321.1 |                | <i>Kockovaella imperatae</i>                              |
| XP_019045848.1 |                | <i>Kwoniella bestiolae</i> CBS 10118                      |
| XP_018260036.1 |                | <i>Kwoniella dejecticola</i> CBS 10117                    |
| XP_003196556.1 |                | <i>Cryptococcus gattii</i> WM276                          |

|   |                |                                                        |
|---|----------------|--------------------------------------------------------|
| 2 | OWZ29927.1     | <i>Cryptococcus neoformans</i> var. <i>grubii</i> c45  |
|   | XP_019010711.1 | <i>Kwoniella pini</i> CBS 10737                        |
|   | POY75593.1     | <i>Rhodotorula taiwanensis</i>                         |
|   | XP_018280147.1 | <i>Cutaneotrichosporon oleaginosum</i>                 |
|   | EKD01798.1     | <i>Trichosporon asahii</i> var. <i>asahii</i> CBS 8904 |
|   | XP_014181811.1 | <i>Trichosporon asahii</i> var. <i>asahii</i> CBS 2479 |
| 3 | CDM38126       | <i>Penicillium roqueforti</i> FM164                    |
|   | XP_660973.1    | <i>Aspergillus nidulans</i> FGSC A4                    |
| 4 | PKK47514.1     | <i>Trichoderma harzianum</i> CL102_9848                |
|   | Th_IOC3844     | <i>Trichoderma harzianum</i> IOC3844                   |
|   | XP_024778108.1 | <i>Trichoderma harzianum</i> CBS 226.95                |
|   | KKP03054.1     | <i>Trichoderma harzianum</i>                           |
|   | XP_013955330.1 | <i>Trichoderma virens</i> Gv29-8                       |
| 5 | ETS03553.1     | <i>Trichoderma reesei</i> RUT C-30                     |
|   | XP_006964036.1 | <i>Trichoderma reesei</i> QM6a                         |
|   | XP_013941191.1 | <i>Trichoderma atroviride</i> IMI 206040               |
|   | XP_024764890.1 | <i>Trichoderma asperellum</i> CBS 433.97               |
|   | KOS18048.1     | <i>Escovopsis weberi</i>                               |
| 6 | CZT51594.1     | <i>Rhynchosporium secalis</i>                          |
|   | CZT06835.1     | <i>Rhynchosporium agropyri</i>                         |
|   | CZT07141.1     | <i>Rhynchosporium commune</i>                          |
|   | PMD16076.1     | <i>Pezoloma ericae</i>                                 |
|   | PMD30568.1     | <i>Hyaloscypha variabilis</i> F                        |
|   | XP_024739234.1 | <i>Meliniomyces bicolor</i> E                          |
|   | XP_018061285.1 | <i>Phialocephala scopiformis</i>                       |
|   | CZR63207.1     | <i>Phialocephala subalpina</i>                         |
|   | XP_007288749.1 | <i>Marssonina brunnea</i>                              |
|   | PQE16296.1     | <i>Rutstroemia</i> sp. NJR-2017a WRK4                  |
|   | PQE03599.1     | <i>Rutstroemia</i> sp. NJR-2017a BBW                   |
|   | ESZ95397.1     | <i>Sclerotinia borealis</i> F-4128                     |
|   | EMR81895.1     | <i>Botrytis cinerea</i> BcDW1                          |
|   | XP_024552100.1 | <i>Botrytis cinerea</i> B05.10                         |
|   | CCD51977.1     | <i>Botrytis cinerea</i> T4                             |
|   | KFX95591.1     | <i>Pseudogymnoascus</i> sp. VKM F-3557                 |
|   | OBT56849.1     | <i>Pseudogymnoascus</i> sp. 24MN13                     |
|   | KFZ12187.1     | <i>Pseudogymnoascus</i> sp. VKM F4519 (FW-2642)        |
|   | XP_018129406.1 | <i>Pseudogymnoascus verrucosus</i>                     |
|   | 7              | KUI68282.1                                             |



|    |                |                                              |
|----|----------------|----------------------------------------------|
| 7  | KUI55118.1     | <i>Valsa mali</i> var. <i>pyri</i>           |
|    | POS76166.1     | <i>Diaporthe helianthi</i>                   |
|    | KKY36004.1     | <i>Diaporthe ampelina</i>                    |
|    | PSS02243.1     | <i>Coniella lustricola</i>                   |
| 8  | XP_016589835.1 | <i>Sporothrix schenckii</i> 1099-18          |
|    | KIH94787.1     | <i>Sporothrix brasiliensis</i> 5110          |
|    | EPE08882.1     | <i>Ophiostoma piceae</i> UAMH 11346          |
| 9  | XP_009849767.1 | <i>Neurospora tetrasperma</i> FGSC 2508      |
|    | XP_962712.2    | <i>Neurospora crassa</i> OR74A               |
|    | XP_003347695.1 | <i>Sordaria macrospora</i> k-hell            |
|    | XP_006693821.1 | <i>Chaetomium thermophilum</i>               |
|    | KXX83256.1     | <i>Madurella mycetomatis</i>                 |
|    | XP_003660436.1 | <i>Thermothelomyces thermophila</i>          |
| 10 | KLU85969.1     | <i>Magnaporthiopsis poae</i> ATCC 64411      |
|    | XP_009224916.1 | <i>Gaeumannomyces tritici</i> R3-111a-1      |
|    | XP_003714853.1 | <i>Magnaporthe oryzae</i> 70-15              |
| 11 | OTA63138.1     | <i>Hypoxylon</i> sp. EC38                    |
|    | OTA97472.1     | <i>Hypoxylon</i> sp. CO27-5                  |
|    | OTB08885.1     | <i>Hypoxylon</i> sp. CI-4A                   |
|    | OTB14150.1     | <i>Daldinia</i> sp. EC12                     |
|    | KXJ95218.1     | <i>Microdochium bolleyi</i>                  |
| 12 | ELA25990.1     | <i>Colletotrichum fructicola</i> Nara gc5    |
|    | ENH84300.1     | <i>Colletotrichum orbiculare</i> MAFF 240422 |
| 13 | OLN97553.1     | <i>Colletotrichum chlorophyti</i>            |
| 14 | KXH28512.1     | <i>Colletotrichum nymphaeae</i> SA-01        |
|    | KXH27412.1     | <i>Colletotrichum simmondsii</i>             |
|    | XP_022478568.1 | <i>Colletotrichum orchidophilum</i>          |
|    | KXH59612.1     | <i>Colletotrichum salicis</i>                |
|    | XP_008097168.1 | <i>Colletotrichum graminicola</i> M1.001     |
|    | KDN69204.1     | <i>Colletotrichum sublineola</i>             |
|    | KZL75422.1     | <i>Colletotrichum tofieldiae</i>             |
|    | OHW92794.1     | <i>Colletotrichum incanum</i>                |
|    | KZL81134.1     | <i>Colletotrichum incanum</i>                |

**Supplementary Table S9.** Description of the genes found in the coregulation networks.

| <b>Network ID</b> | <b>Protein ID</b> | <b>Protein name</b>                       |
|-------------------|-------------------|-------------------------------------------|
| 1                 | KKP06817.1        | Hypotetical protein                       |
| 2                 | KKP05702.1        | Hypotetical protein                       |
| 3                 | KKP00617.1        | Hypotetical protein                       |
| 4                 | KKP03936.1        | Kinase DC2                                |
| 5                 | KKP07737.1        | Translation initiation factor 3 subunit k |
| 6                 | KKP01671.1        | Hypotetical protein                       |
| 7                 | KKO98378.1        | Translation initiation factor subunit 1   |
| 8                 | KKP03537.1        | Murein transglycosylase                   |
| 9                 | KKO96961.1        | Hypotetical protein                       |
| 10                | KKP00812.1        | Hypotetical protein                       |
| 11                | KKP06268.1        | Hypotetical protein                       |
| 12                | KKP01476.1        | Peptidyl-prolyl-cis-trans isomerase sspl  |
| 13                | KKO97887.1        | Hypotetical protein                       |
| 14                | KKO99717.1        | Hypotetical protein                       |
| 15                | KKP00810.1        | Hypotetical protein                       |
| 16                | KKP07167.1        | Hypotetical protein                       |
| 17                | KKP02416.1        | Hypotetical protein                       |
| 18                | KKO98063.1        | Vacuolar ATP synthase subunit D           |
| 19                | KKP03148.1        | Hypotetical protein                       |
| 20                | KKP07719.1        | Hypotetical protein                       |
| 21                | KKO97889.1        | Hypotetical protein                       |
| 22                | KKP00888.1        | ATP-dependent RNA helicase DED1           |
| 23                | KKP02267.1        | Ubiquitin-protein ligase E3 C             |
| 24                | KKP02972.1        | Hypotetical protein                       |
| 25                | KKO98726.1        | DUF718                                    |
| 26                | KKP02131.1        | Hypotetical protein                       |
| 27                | KKO96618.1        | Hypotetical protein                       |
| 28                | KKO98708.1        | Hypotetical protein                       |
| 29                | KKP02590.1        | Proteasome subunit alpha type-2           |
| 30                | KKO99933.1        | Hypotetical protein                       |
| 31                | KKP07598.1        | Undercaprenyl diphosphate synthase        |
| 32                | KKP00804.1        | 14-3-3 family protein                     |
| 33                | KKP02280.1        | ATP-dependent RNA helicase SUB2           |
| 34                | KKP03054.1        | Cellulose Degradation regulator 2 – CLR2  |
| 35                | KKO97002.1        | Hydroxyacylglutathione hydrolase          |
| 36                | KKP01112.1        | Hypotetical protein                       |
